# Supplementary material for: Glycosylation initiated cationic ring-opening polymerization of tetrahydrofuran to prepare neo-glycopolymers
Source: Royal Society of Chemistry journal article supplement (doi:10.1039/c0cc00566e), 2010-01-01
Supplement: c0cc00566e.pdf [file c0cc00566e.pdf]

## Supporting Information

### Glycosylation Initiated Cationic Ring-Opening Polymerization of Tetrahydrofuran to Prepare Neo-glycopolymers

**Yao Li and Biao Yu\***

*State Key Laboratory of Bio-organic and Natural Products Chemistry,  
Shanghai Institute of Organic Chemistry, Chinese Academy of Sciences,  
Shanghai 200032, China.  
E-mail: byu@mail.sioc.ac.cn*

#### Contents

|                                                                                | page   |
|--------------------------------------------------------------------------------|--------|
| 1. General procedures                                                          | S1-S3  |
| 2. Preparation and characterization of glycosyl <i>ortho</i> -hexynylbenzoates | S3     |
| 3. Preparation and characterization of G-PTHFs                                 | S4-S6  |
| 4. Preparation and characterization of G-PTHF <b>3</b>                         | S7     |
| 5. NMR spectra of new compounds                                                | S8-S23 |

## 1. General procedures

Commercial reagents were used without further purification unless specialized. Solvents were dried and redistilled prior to use in the usual way. Thin layer chromatography (TLCs) were performed on precoated plates of Silica Gel HF254 (0.5 mm, Yantai, China). Flash column chromatography was performed on Silica Gel H (10–40  $\mu$ , Yantai, China).  $^1\text{H}$  and  $^{13}\text{C}$  NMR spectra were recorded on a Varian AM 300 or Bruker AM 400 spectrometer with  $\text{Me}_4\text{Si}$  as the internal standard. Chemical shifts are recorded in  $\delta$  values and  $J$  values were given in Hz. Mass spectra were obtained on a Bruker Daltonics, Inc. APEXIII 7.0 TESLA FTMS mass spectrometer. Atomic force microscopy (AFM) was performed on a Veeco Nanoscope IVa MultiMode microscope. Molecular weights ( $M_n$ ,  $M_w$ ) and polydispersity indexes ( $M_w/M_n$ ) of the synthesized G-PTHF samples were measured by conventional gel chromatography (GPC) system equipped with a waters 1515 Isocratic HPLC pump, a Waters 2414 refractive index detector, and a set of Waters Styragel columns (HR3, HR4 and HR5, 7.8 $\times$ 300 mm). GPC measurements were carried out at 35  $^\circ\text{C}$  using THF as eluent with a flow rate of 1.0 mL/min. The system was calibrated with linear Polystyrene standards.

### Preparation of $\text{PPh}_3\text{AuNTf}_2$ (commercially available).<sup>S1</sup>

$\text{HNTf}_2$  (5620 mg, 20 mmol) was dissolved in  $\text{H}_2\text{O}$  (20 mL),  $\text{Ag}_2\text{CO}_3$  (2760 mg, 10 mmol) was then added. After refluxing for 3 h, the solid was filtered off. The solution was dried in vacuo, and then dissolved in dry  $\text{CH}_2\text{Cl}_2$  (20 mL).  $[\text{Au}(\text{PPh}_3)\text{Cl}]$  (7730 mg, 20 mmol) was added. After stirring in dark for 15 min, the solid ( $\text{AgCl}$ ) was filtered off and the solution was dried in vacuo to provide  $\text{PPh}_3\text{AuNTf}_2$  quantitatively.

## 2. Preparation and characterization of glycosyl *ortho*-hexynylbenzoates

### General procedures for the preparation of glycosyl *ortho*-hexynylbenzoates

**1a-e.** Deca-*O*-acetyl-maltotriose<sup>S2</sup> (1550 mg, 1.68 mmol), *ortho*-hexynylbenzoic acid<sup>S1</sup> (372 mg, 1.84 mmol), EDCI (416 mg, 2.18 mmol), and DMAP (205 mg, 1.68 mmol) were dissolved in  $\text{CH}_2\text{Cl}_2$  (3 mL), then DIPEA (0.6 mL, 3.35 mmol) was added. After stirring for 5 h, the solution was diluted with  $\text{CH}_2\text{Cl}_2$ , and was then washed with water and brine. The organic layer was dried over  $\text{Na}_2\text{SO}_4$ , filtered,

and evaporated in vacuo. The residue was purified by silica gel column chromatography (petroleum ether-EtOAc 1.5:1) to give deca-*O*-acetyl-maltotriosyl *ortho*-hexynylbenzoate **1e** (1739 mg, 94%,  $\alpha/\beta = 3:17$ , which are inseparable) as a white foam.

(S1: Li, Y. et al.; Yang, X.; Liu, Y.; Zhu, C.; Yang, Y.; Yu, B. *Chem. Eur. J.* **2010**, 16, 1871-1882. S2: Buijsman, R.C.; Basten, J. E.; Dreef-Tromp, C. M.; van der Marel, G. A.; van Boeckel, CA. A.; van Boom, J. H. *Bioorg. Med. Chem.* **1999**, 7, 1881-1890)

**Characterization of glycosyl *ortho*-hexynylbenzoates: Literature for known compounds and characterization data for new compounds.**

| Compounds | Literature or characterization data                                                                                                                                                                                                                                                                                                                                                                                                                                                                                                                                                                                                                                                                                                                                                                                                                                                                                                                                                                                                                                                                          |
|-----------|--------------------------------------------------------------------------------------------------------------------------------------------------------------------------------------------------------------------------------------------------------------------------------------------------------------------------------------------------------------------------------------------------------------------------------------------------------------------------------------------------------------------------------------------------------------------------------------------------------------------------------------------------------------------------------------------------------------------------------------------------------------------------------------------------------------------------------------------------------------------------------------------------------------------------------------------------------------------------------------------------------------------------------------------------------------------------------------------------------------|
| <b>1a</b> | Yang, Y.; Li, Y.; Yu, B. <i>J. Am. Chem. Soc.</i> <b>2009</b> , 131, 12076-12077.                                                                                                                                                                                                                                                                                                                                                                                                                                                                                                                                                                                                                                                                                                                                                                                                                                                                                                                                                                                                                            |
| <b>1b</b> | Li, Y.; Yang, X.; Liu, Y.; Zhu, C.; Yang, Y.; Yu, B. <i>Chem. Eur. J.</i> <b>2010</b> , 16, 1871-1882.                                                                                                                                                                                                                                                                                                                                                                                                                                                                                                                                                                                                                                                                                                                                                                                                                                                                                                                                                                                                       |
| <b>1c</b> | Li, Y.; Yang, X.; Liu, Y.; Zhu, C.; Yang, Y.; Yu, B. <i>Chem. Eur. J.</i> <b>2010</b> , 16, 1871-1882.                                                                                                                                                                                                                                                                                                                                                                                                                                                                                                                                                                                                                                                                                                                                                                                                                                                                                                                                                                                                       |
| <b>1d</b> | Yang, Y.; Li, Y.; Yu, B. <i>J. Am. Chem. Soc.</i> <b>2009</b> , 131, 12076-12077.                                                                                                                                                                                                                                                                                                                                                                                                                                                                                                                                                                                                                                                                                                                                                                                                                                                                                                                                                                                                                            |
| <b>1e</b> | <sup>1</sup> H NMR (100 MHz, CDCl <sub>3</sub> ): $\delta$ 8.01 (d, 0.15 H, $J = 7.6$ Hz), 7.90 (d, 0.85 H, $J = 7.6$ Hz), 7.60-7.27 (m, 3 H), 6.54 (s, 0.15 H), 6.01 (d, 0.85 H, $J = 8.0$ Hz), 5.65 (t, 0.15 H, $J = 9.6$ Hz), 5.46-5.26 (m, 4.85 H), 5.14 (t, 1 H, $J = 8.4$ Hz), 5.07 (t, 1 H, $J = 9.6$ Hz), 4.86 (d, 1 H, $J = 10.0$ Hz), 4.76 (d, 1 H, $J = 10.0$ Hz), 4.56-3.88 (m, 11 H), 2.58-2.45 (m, 2 H), 2.20-1.94 (m, 30 H), 1.70-1.45 (m, 4 H), 0.97 (t, 3 H, $J = 7.2$ Hz); <sup>13</sup> C NMR (100 MHz, CDCl <sub>3</sub> ): $\delta$ 170.4, 170.3 (2C), 170.2, 170.1, 170.0, 169.5, 169.4, 169.2, 163.9, 163.0, 134.8, 134.5, 132.3, 130.6, 130.4, 129.8, 129.1, 127.2, 127.0, 125.6, 125.1, 97.1, 96.9, 95.9, 95.7, 95.5, 91.5, 89.4, 79.5, 78.8, 77.2, 74.8, 73.4, 73.3, 72.7, 72.4, 72.3, 71.9, 71.4, 70.8, 70.5, 70.2, 69.9, 69.8, 69.1, 68.8, 68.3, 67.7, 62.6, 62.4, 62.1, 61.2, 30.4, 30.3, 21.8, 21.7, 20.6 (2C), 20.5, 20.4, 20.3 (2C), 20.2, 19.2, 13.4; HRMS (ESI) calcd C <sub>51</sub> H <sub>64</sub> O <sub>27</sub> Na [M+Na] <sup>+</sup> 1131.35272, found 1131.35538. |

### 3. Preparation and characterization of G-PTHF's

**General procedures for preparation of G-PTHF's.** Under an argon atmosphere, to a solution of 3,4,6-tri-*O*-acetyl-2-azido-2-deoxy-D-glucopyranosyl *ortho*-hexynylbenzoate **1a** (206 mg, 0.4 mmol) in dry THF (35 mL) at room temperature was added a THF solution of PPh<sub>3</sub>AuNTf<sub>2</sub> (0.2 mmol, 5 mL) under vigorously stirring. After different reaction time, the mixture was poured into ice cold water. The resulting G-PTHF **2a** was precipitated, which was then taken from the solution and dried under vacuum.

For a small scale analysis, a sample was taken from the reaction mixture via syringe and charged into cold water. The resulting aqueous solution was concentrated to give a residue, which was then purified by silica gel column chromatography (petroleum ether-EtOAc 3 : 1 to CH<sub>2</sub>Cl<sub>2</sub>-MeOH 25 : 1) to provide the G-PTHF **2a**.

The G-PTHF could also be purified by gel column Sephadex LH-20 (CH<sub>2</sub>Cl<sub>2</sub>-MeOH 1 : 1) or precipitation from *N,N*-dimethylformamide.

#### The <sup>1</sup>H and <sup>13</sup>C NMR data of G-PTHF's

| Compounds                                                  | characterization data                                                                                                                                                                                                                                                                                                                                                                                                                                                                                             |
|------------------------------------------------------------|-------------------------------------------------------------------------------------------------------------------------------------------------------------------------------------------------------------------------------------------------------------------------------------------------------------------------------------------------------------------------------------------------------------------------------------------------------------------------------------------------------------------|
| G-PTHF <b>2a</b><br>(0.1 M in THF-d <sub>8</sub> , at 2 d) | <sup>1</sup> H NMR (400 MHz, CDCl <sub>3</sub> ): δ 5.48 (dd, 0.54 H, <i>J</i> = 10.0, 0.8 Hz, H4α), 5.09–4.95 (m, 2 H, H1α, H3α, H4β, H3β), 4.39(d, 0.46 H, <i>J</i> = 8.0 Hz, H1β), 4.29 (dd, 1 H, <i>J</i> = 12.4, 4.4 Hz, H6β, H6α), 4.15–4.00 (m, 1.76 H, H6β', H5α, H6α'), 3.62 (m, 0.52 H, H5β), 3.48 (m, 0.46 H, H2β), 3.39 (s, ~1.1 H, CD <sub>2</sub> ), 3.28 (m, 0.56 H, H2α), 2.05–1.99 (m, 9 H, Ac), 1.58 (s, ~1.1 H, CD <sub>2</sub> ).                                                             |
| G-PTHF <b>2a</b><br>(0.01 M in THF, at 15 min)             | <sup>1</sup> H NMR (400 MHz, CDCl <sub>3</sub> ): δ 5.48 (dd, 0.55 H, <i>J</i> = 10.0, 0.8 Hz, H4α), 5.09–4.95 (m, 2 H, H1α, H3α, H4β, H3β), 4.39(d, 0.46 H, <i>J</i> = 8.0 Hz, H1β), 4.29 (dd, 1 H, <i>J</i> = 12.4, 4.4 Hz, H6β, H6α), 4.15–4.00 (m, 1.85 H, H6β', H5α, H6α'), 3.41 (m, ~390 H),. 2.05–1.99 (m, 9 H, Ac), 1.62 (m, ~390 H); <sup>13</sup> C NMR (75 MHz, CDCl <sub>3</sub> ): δ 170.4, 169.9, 169.6, 102.0, 97.8, 71.4, 70.7, 70.5, 68.8, 68.5, 67.9, 67.5, 63.7, 62.5, 61.8, 60.8, 26.5, 20.6. |
| G-PTHF <b>2b</b><br>(0.01 M in THF, at 15 min)             | <sup>1</sup> H NMR (400 MHz, CDCl <sub>3</sub> ): δ 8.03–7.80 (m, 8 H), 7.59–7.25 (m, 12 H), 5.90 (t, 1 H, <i>J</i> = 9.6 Hz), 5.68 (t, 1 H, <i>J</i> = 9.6 Hz), 5.52 (t, 1                                                                                                                                                                                                                                                                                                                                       |

|                                                               |                                                                                                                                                                                                                                                                                                                                                                                                                                                                                                                                                                                                                                                                                                                        |
|---------------------------------------------------------------|------------------------------------------------------------------------------------------------------------------------------------------------------------------------------------------------------------------------------------------------------------------------------------------------------------------------------------------------------------------------------------------------------------------------------------------------------------------------------------------------------------------------------------------------------------------------------------------------------------------------------------------------------------------------------------------------------------------------|
| THF, at 9 min)                                                | H, $J = 8.0$ Hz), 4.65 (dd, 1 H, $J = 12.4, 2.8$ Hz), 4.51 (dd, 1 H, $J = 12.0, 5.2$ Hz), 4.16 (m, 1 H), 3.41 (m, $\sim 700$ H), 1.63 (m, $\sim 700$ H);<br>$^{13}\text{C}$ NMR (75 MHz, $\text{CDCl}_3$ ): $\delta$ 166.1, 165.8, 165.0, 133.4, 133.1(2C), 129.9, 129.8, 129.7 (3C), 128.8, 128.4, 128.3 (2C), 101.2, 72.9, 72.2, 71.9, 70.8 (2C), 70.6, 70.4 (2C), 70.2, 70.1, 70.0, 69.8, 63.2, 62.7, 26.9, 26.7, 26.5, 26.3, 26.2, 26.0.                                                                                                                                                                                                                                                                           |
| G-PTHF <b>2c</b><br>(0.01 M in THF, at 15 min)                | $^1\text{H}$ NMR (400 MHz, $\text{CDCl}_3$ ): $\delta$ 8.00 (d, 2 H, $J = 7.6$ Hz), 7.59–7.05 (m, 18 H), 5.25 (t, 1 H, $J = 8.0$ Hz), 4.83–4.70 (m, 2 H), 4.69–4.45 (m, 5 H), 3.90–3.70 (m, 5 H), 3.40 (m, $\sim 1092$ H), 1.62 (m, $\sim 1092$ H); $^{13}\text{C}$ NMR (75 MHz, $\text{CDCl}_3$ ): $\delta$ 165.1, 138.1, 137.9, 137.8, 134.2, 134.0, 132.9, 132.0, 130.0, 129.7, 129.3, 129.1, 128.4, 128.3 (2C), 128.2, 128.0, 127.8, 127.7, 127.6, 101.1, 82.8, 78.0, 76.7, 75.2, 75.0, 73.8, 73.5, 71.4, 70.7, 70.6, 70.4, 70.1, 69.7, 69.4, 68.8, 67.4, 62.6, 27.3, 26.8, 26.6, 26.5, 26.3, 26.0.                                                                                                                |
| G-PTHF <b>2d</b><br>(0.01 M in THF, at 15 min)                | $^1\text{H}$ NMR (400 MHz, $\text{CDCl}_3$ ): $\delta$ 7.84–7.71 (m, 4 H), 7.40–7.25 (m, 5 H), 5.79 (t, 1 H, $J = 9.6$ Hz), 5.40 (d, 1 H, $J = 8.4$ Hz), 5.35 (t, 1 H, $J = 9.6$ Hz), 5.26 (d, 1 H, $J = 3.6$ Hz), 4.98 (t, 1 H, $J = 9.6$ Hz), 4.66 (m, 2 H), 4.22–4.00 (m, 4 H), 3.86–3.71 (m, 3 H), 3.62–3.19 (m, $\sim 430$ H), 2.05 (s, 3 H), 2.04 (s, 3 H), 2.02 (s, 3 H), 1.89 (s, 3 H), 1.75–1.50 (m, $\sim 430$ H); $^{13}\text{C}$ NMR (75 MHz, $\text{CDCl}_3$ ): $\delta$ 170.4, 169.8, 169.7, 169.6, 137.9, 134.1, 128.4, 127.7, 127.5, 123.4, 98.2, 97.8, 75.7, 74.2, 73.5, 71.5, 70.6, 70.3, 70.1, 69.6, 68.8, 68.3, 68.1, 62.6, 61.4, 61.0, 55.2, 26.9, 26.6, 26.5, 26.3, 26.1, 26.0, 20.6 (2C), 20.5. |
| G-PTHF <b>2e</b><br>(0.1 M in THF-d <sub>8</sub> , at 15 min) | $^1\text{H}$ NMR (400 MHz, $\text{CDCl}_3$ ): $\delta$ 5.52 (t, 0.6 H, $J = 9.2$ Hz), 5.47–5.22 (m, 4.4 H), 5.07 (t, 1 H, $J = 10.0$ Hz), 4.95 (d, 0.6 H, $J = 3.6$ Hz), 4.89–4.70 (m, 3 H), 4.53–4.40 (m, 2.4 H), 4.36–4.16 (m, 3 H), 4.10–3.89 (m, 6 H), 3.39 (s, $\sim 0.60$ H, $\text{CD}_2$ ), 2.20–1.95 (m, 30 H), 1.56 (s, $\sim 0.60$ H, $\text{CD}_2$ ).                                                                                                                                                                                                                                                                                                                                                      |
| G-PTHF <b>2e</b><br>(0.01 M in THF, at 5 min)                 | $^1\text{H}$ NMR (400 MHz, $\text{CDCl}_3$ ): $\delta$ 5.52 (t, 0.6 H, $J = 9.2$ Hz), 5.47–5.22 (m, 4.4 H), 5.07 (t, 1 H, $J = 10.0$ Hz), 4.95 (d, 0.6 H, $J = 3.6$ Hz), 4.89–4.70 (m, 3 H), 4.53–4.40 (m, 2.4 H), 4.36–4.16                                                                                                                                                                                                                                                                                                                                                                                                                                                                                           |

(m, 3 H), 4.10–3.89 (m, 6 H), 3.39 (s, ~570 H), 2.20–1.97 (m, 30 H), 1.56 (s, ~570 H);  $^{13}\text{C}$  NMR (75 MHz,  $\text{CDCl}_3$ ):  $\delta$  170.6, 170.5, 170.3, 169.7, 95.7, 76.7, 72.6, 72.4, 72.2, 71.5, 70.6, 70.4, 70.2, 68.8, 62.7, 61.3, 26.9, 26.5, 26.1, 20.8 (2C), 20.5.

### Characterization of the glycosylation initiated polymerization of THF with donors **1a-e**.<sup>a</sup>

| Entry           | Donors    | conc  | Time (min) | Conv. <sup>c</sup> (%) | $M_n^d$ | $M_w^d$ | MP <sup>d</sup> | $M_z^d$ | $M_{z+1}^d$ | $M_w/M_n$ |
|-----------------|-----------|-------|------------|------------------------|---------|---------|-----------------|---------|-------------|-----------|
| 1 <sup>e</sup>  | <b>1a</b> | 0.01  | 5          | 2.5                    | 8984    | 11310   | 12403           | 13365   | 15405       | 1.26      |
| 2 <sup>e</sup>  | <b>1a</b> | 0.01  | 15         | 4.7                    | 16010   | 23351   | 32655           | 29534   | 34481       | 1.46      |
| 3               | <b>1a</b> | 0.01  | 45         | 8.8                    | 20424   | 33507   | 35816           | 46160   | 56896       | 1.64      |
| 4               | <b>1a</b> | 0.01  | 120        | 9.8                    | 23179   | 35951   | 37743           | 49334   | 61543       | 1.55      |
| 5 <sup>e</sup>  | <b>1b</b> | 0.01  | 3          | 2.1                    | 8968    | 10354   | 10559           | 11816   | 13476       | 1.15      |
| 6 <sup>e</sup>  | <b>1b</b> | 0.01  | 9          | 4.6                    | 17561   | 21622   | 24051           | 25105   | 28553       | 1.23      |
| 7               | <b>1b</b> | 0.01  | 17         | 7.1                    | 25181   | 33354   | 41652           | 39513   | 44430       | 1.32      |
| 8               | <b>1b</b> | 0.01  | 28         | 8.3                    | 28179   | 42297   | 61826           | 53190   | 61209       | 1.50      |
| 9               | <b>1b</b> | 0.01  | 65         | 9.1                    | 29295   | 48365   | 53137           | 66246   | 81783       | 1.65      |
| 10              | <b>1b</b> | 0.01  | 120        | 10.6                   | 31346   | 49670   | 54332           | 66706   | 81440       | 1.58      |
| 11              | <b>1b</b> | 0.01  | 2 d        | 19.0                   | 73820   | 100625  | 102158          | 129219  | 155500      | 1.36      |
| 12              | <b>1b</b> | 0.005 | 2 d        | 8.0                    | 50586   | 82580   | 87698           | 117150  | 147862      | 1.63      |
| 13              | <b>1b</b> | 0.04  | 2 d        | 60.0                   | 32727   | 59630   | 57652           | 87806   | 115362      | 1.82      |
| 14 <sup>e</sup> | <b>1c</b> | 0.01  | 5          | 4.0                    | 11823   | 12496   | 13121           | 13061   | 13551       | 1.06      |
| 15              | <b>1c</b> | 0.01  | 15         | 6.6                    | 28488   | 29623   | 30852           | 30620   | 31509       | 1.04      |
| 16              | <b>1c</b> | 0.01  | 45         | 8.6                    | 35984   | 52589   | 77932           | 64134   | 71732       | 1.46      |
| 17              | <b>1c</b> | 0.01  | 120        | 12.1                   | 39663   | 61685   | 65898           | 81259   | 98753       | 1.56      |
| 18 <sup>e</sup> | <b>1d</b> | 0.01  | 5          | 2.6                    | 12074   | 15664   | 17181           | 18857   | 21982       | 1.30      |
| 19              | <b>1d</b> | 0.01  | 15         | 3.3                    | 18902   | 28351   | 37253           | 36903   | 44410       | 1.50      |
| 20              | <b>1d</b> | 0.01  | 45         | 3.9                    | 20219   | 33713   | 39503           | 46552   | 57178       | 1.67      |
| 21              | <b>1d</b> | 0.01  | 120        | 5.0                    | 23797   | 37572   | 43865           | 51413   | 63423       | 1.58      |
| 22 <sup>e</sup> | <b>1e</b> | 0.01  | 5          | 6.0                    | 19126   | 23778   | 24000           | 28152   | 32550       | 1.24      |
| 23              | <b>1e</b> | 0.01  | 15         | 7.1                    | 25723   | 33907   | 40095           | 40028   | 45113       | 1.32      |
| 24              | <b>1e</b> | 0.01  | 45         | 8.2                    | 27115   | 47141   | 47614           | 68925   | 88290       | 1.74      |
| 25              | <b>1e</b> | 0.01  | 120        | 10.0                   | 40844   | 74132   | 77039           | 107876  | 140935      | 1.81      |

<sup>a</sup>In the presence of  $\text{PPh}_3\text{AuNTf}_2$  (0.5 equiv) at rt. <sup>b</sup>The concentration of donor **1b** in THF ( $\text{mol}\cdot\text{L}^{-1}$ ). <sup>c</sup>The conversion of THF into G-PTHF (wt%). <sup>d</sup>Determined by GPC based on polystyrene standards. <sup>e</sup>Small scale experiments were performed (<20 mg initiator).

#### 4. Preparation and characterization of G-PTHF **3**

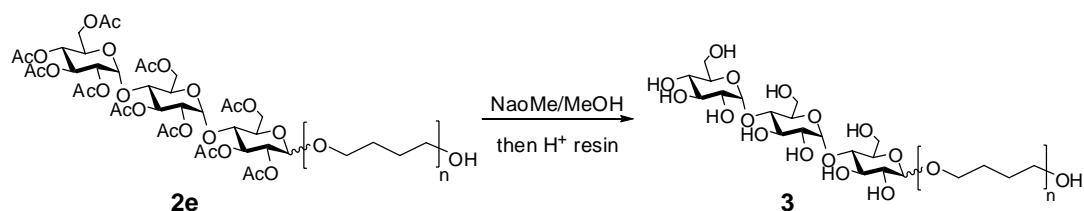

G-PTHF **2e** (60 mg,  $M_n = 19126$ ,  $M_w/M_n = 1.24$ ) was dissolved in MeOH (1.5 mL), NaOMe (4 mg) was added. After stirring overnight, the mixture was neutralized to pH = ~7 with Na<sup>+</sup> exchange resin. The solution was filtered and dried under vacuum to provide G-PTHF **3** (59 mg, 100%) as a white solid: <sup>1</sup>H NMR (300 MHz, CD<sub>3</sub>OD/CDCl<sub>3</sub> = 1 : 1):  $\delta$  5.12 (d, 2 H,  $J = 3.9$  Hz), 4.80 (d, 0.6 H,  $J = 3.9$  Hz), 4.28 (d, 0.4 H,  $J = 7.8$  Hz), 3.46 (s, ~570 H), 1.63 (s, ~570 H); <sup>13</sup>C NMR (100 MHz, CD<sub>3</sub>OD/CDCl<sub>3</sub> = 1 : 1):  $\delta$  106.9, 105.5, 105.4, 84.6, 84.1, 84.0, 82.0, 80.4, 79.2, 77.7, 77.5, 77.3, 77.2, 76.8, 76.5, 75.9(2C), 75.8, 74.9, 74.8, 74.6, 74.5, 74.3, 74.1, 73.9, 73.3, 71.7, 65.4, 64.8, 64.7(2C), 52.5, 52.3, 52.0, 30.4, 30.2, 30.0, 29.9, 28.8.

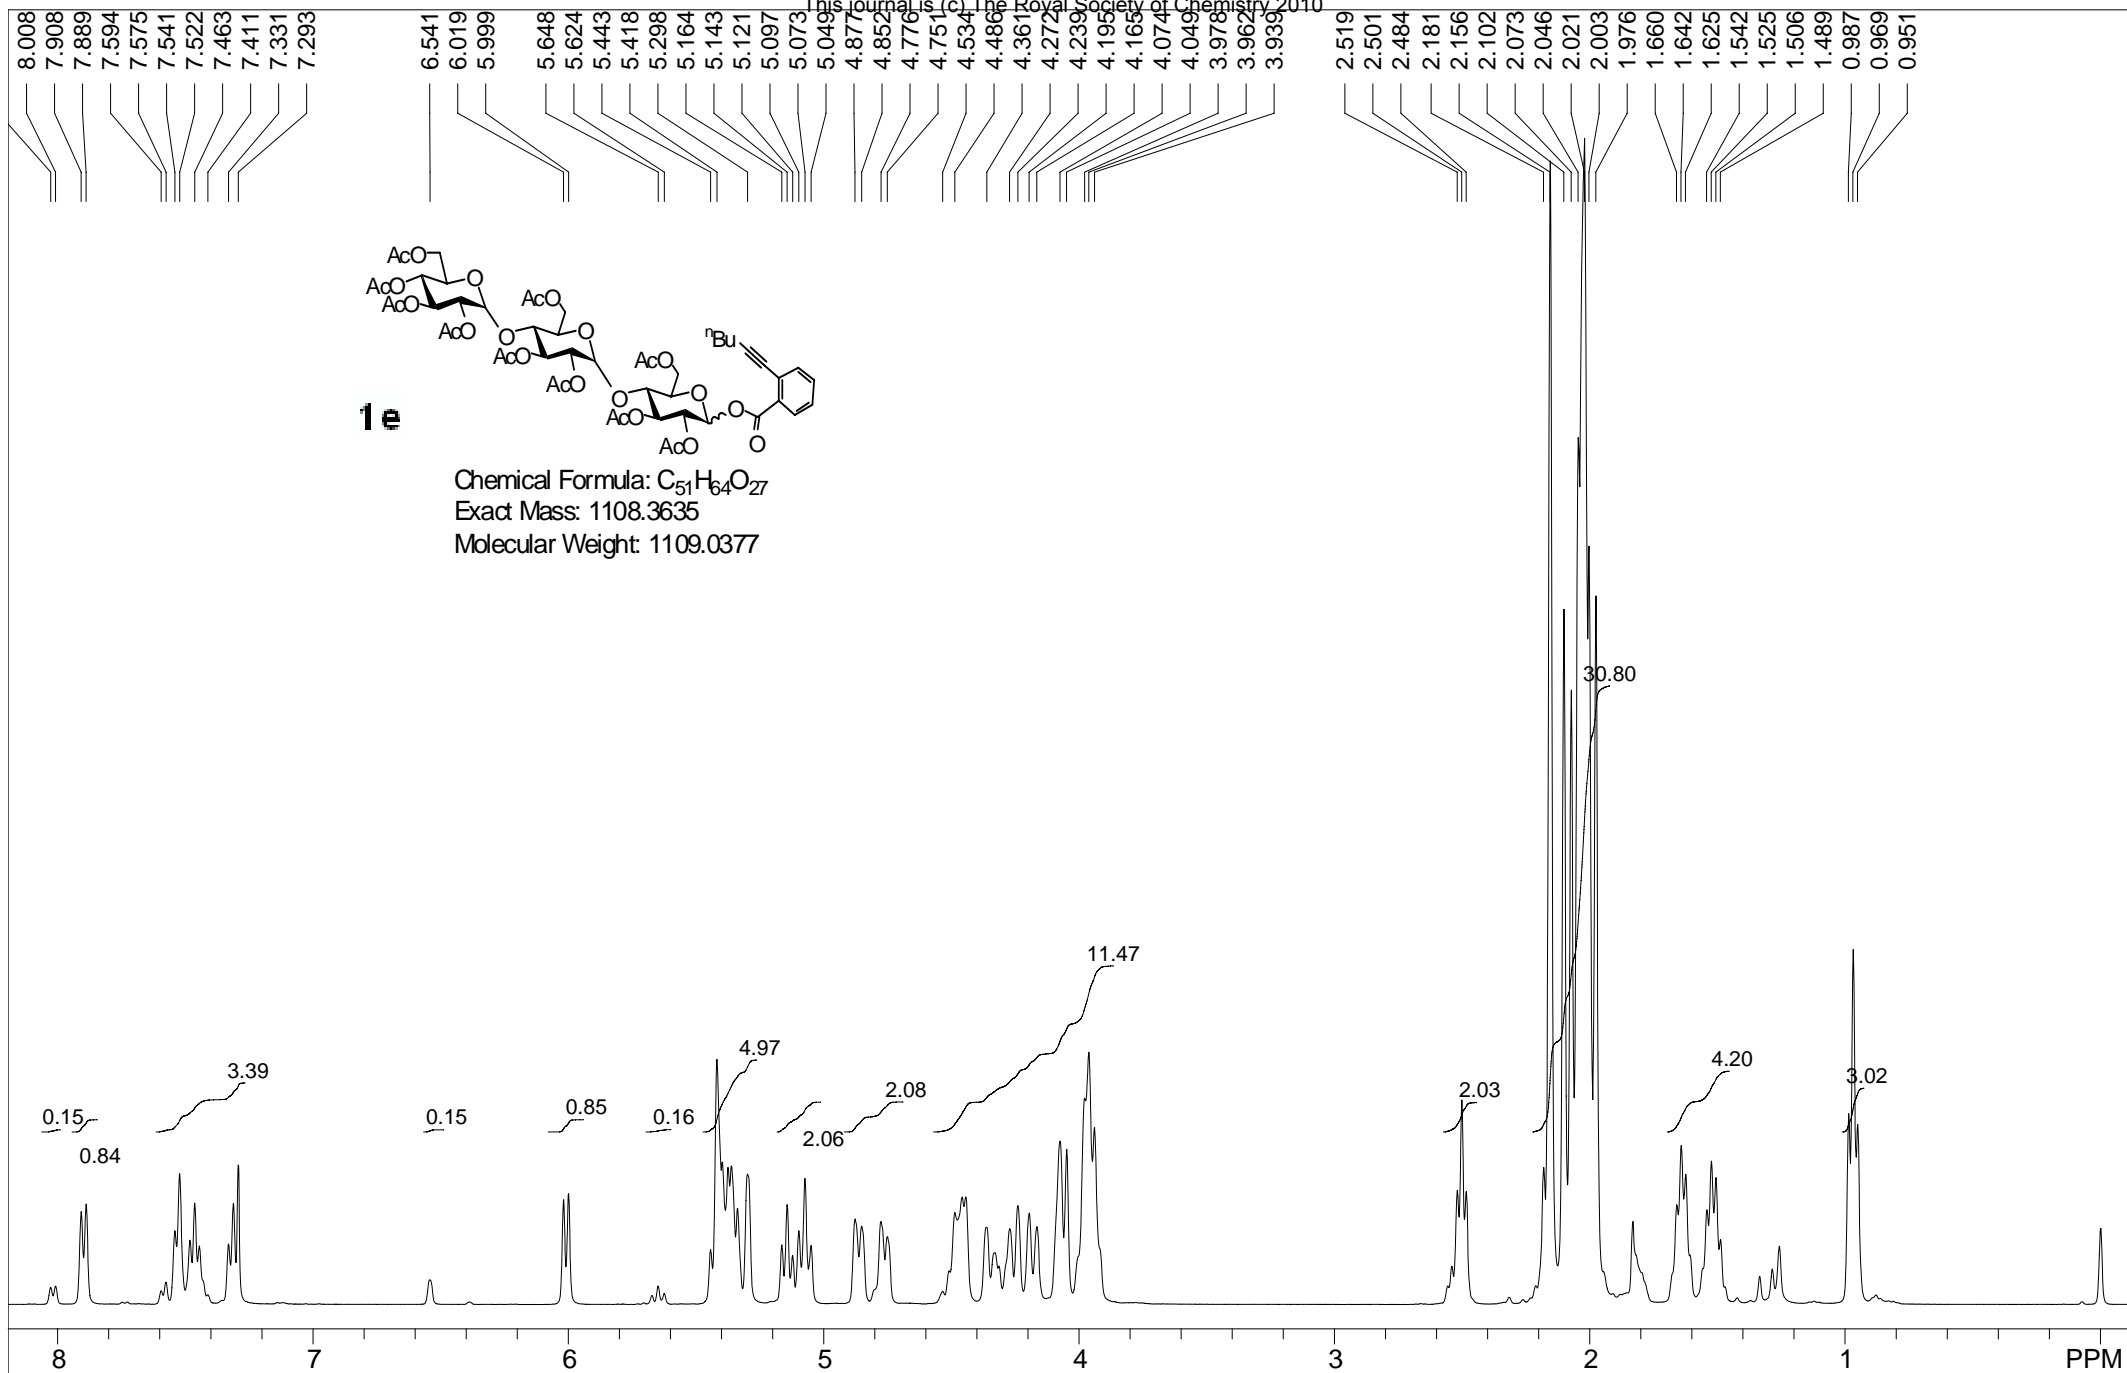

USER: nmr -- DATE: 09:36:28.843 +0800 nmr@EP-ZH107708

|             |            |             |             |                           |
|-------------|------------|-------------|-------------|---------------------------|
| F1: 400.120 | F2: 1.000  | SW1: 8224   | OF1: 2474.4 | PTS1d: 32768              |
| EX: zg30    | PW: 9.3 us | PD: 1.0 sec | NA: 16      | LB: 0.3                   |
|             |            |             |             | Nuts - \$20051451494 10.1 |



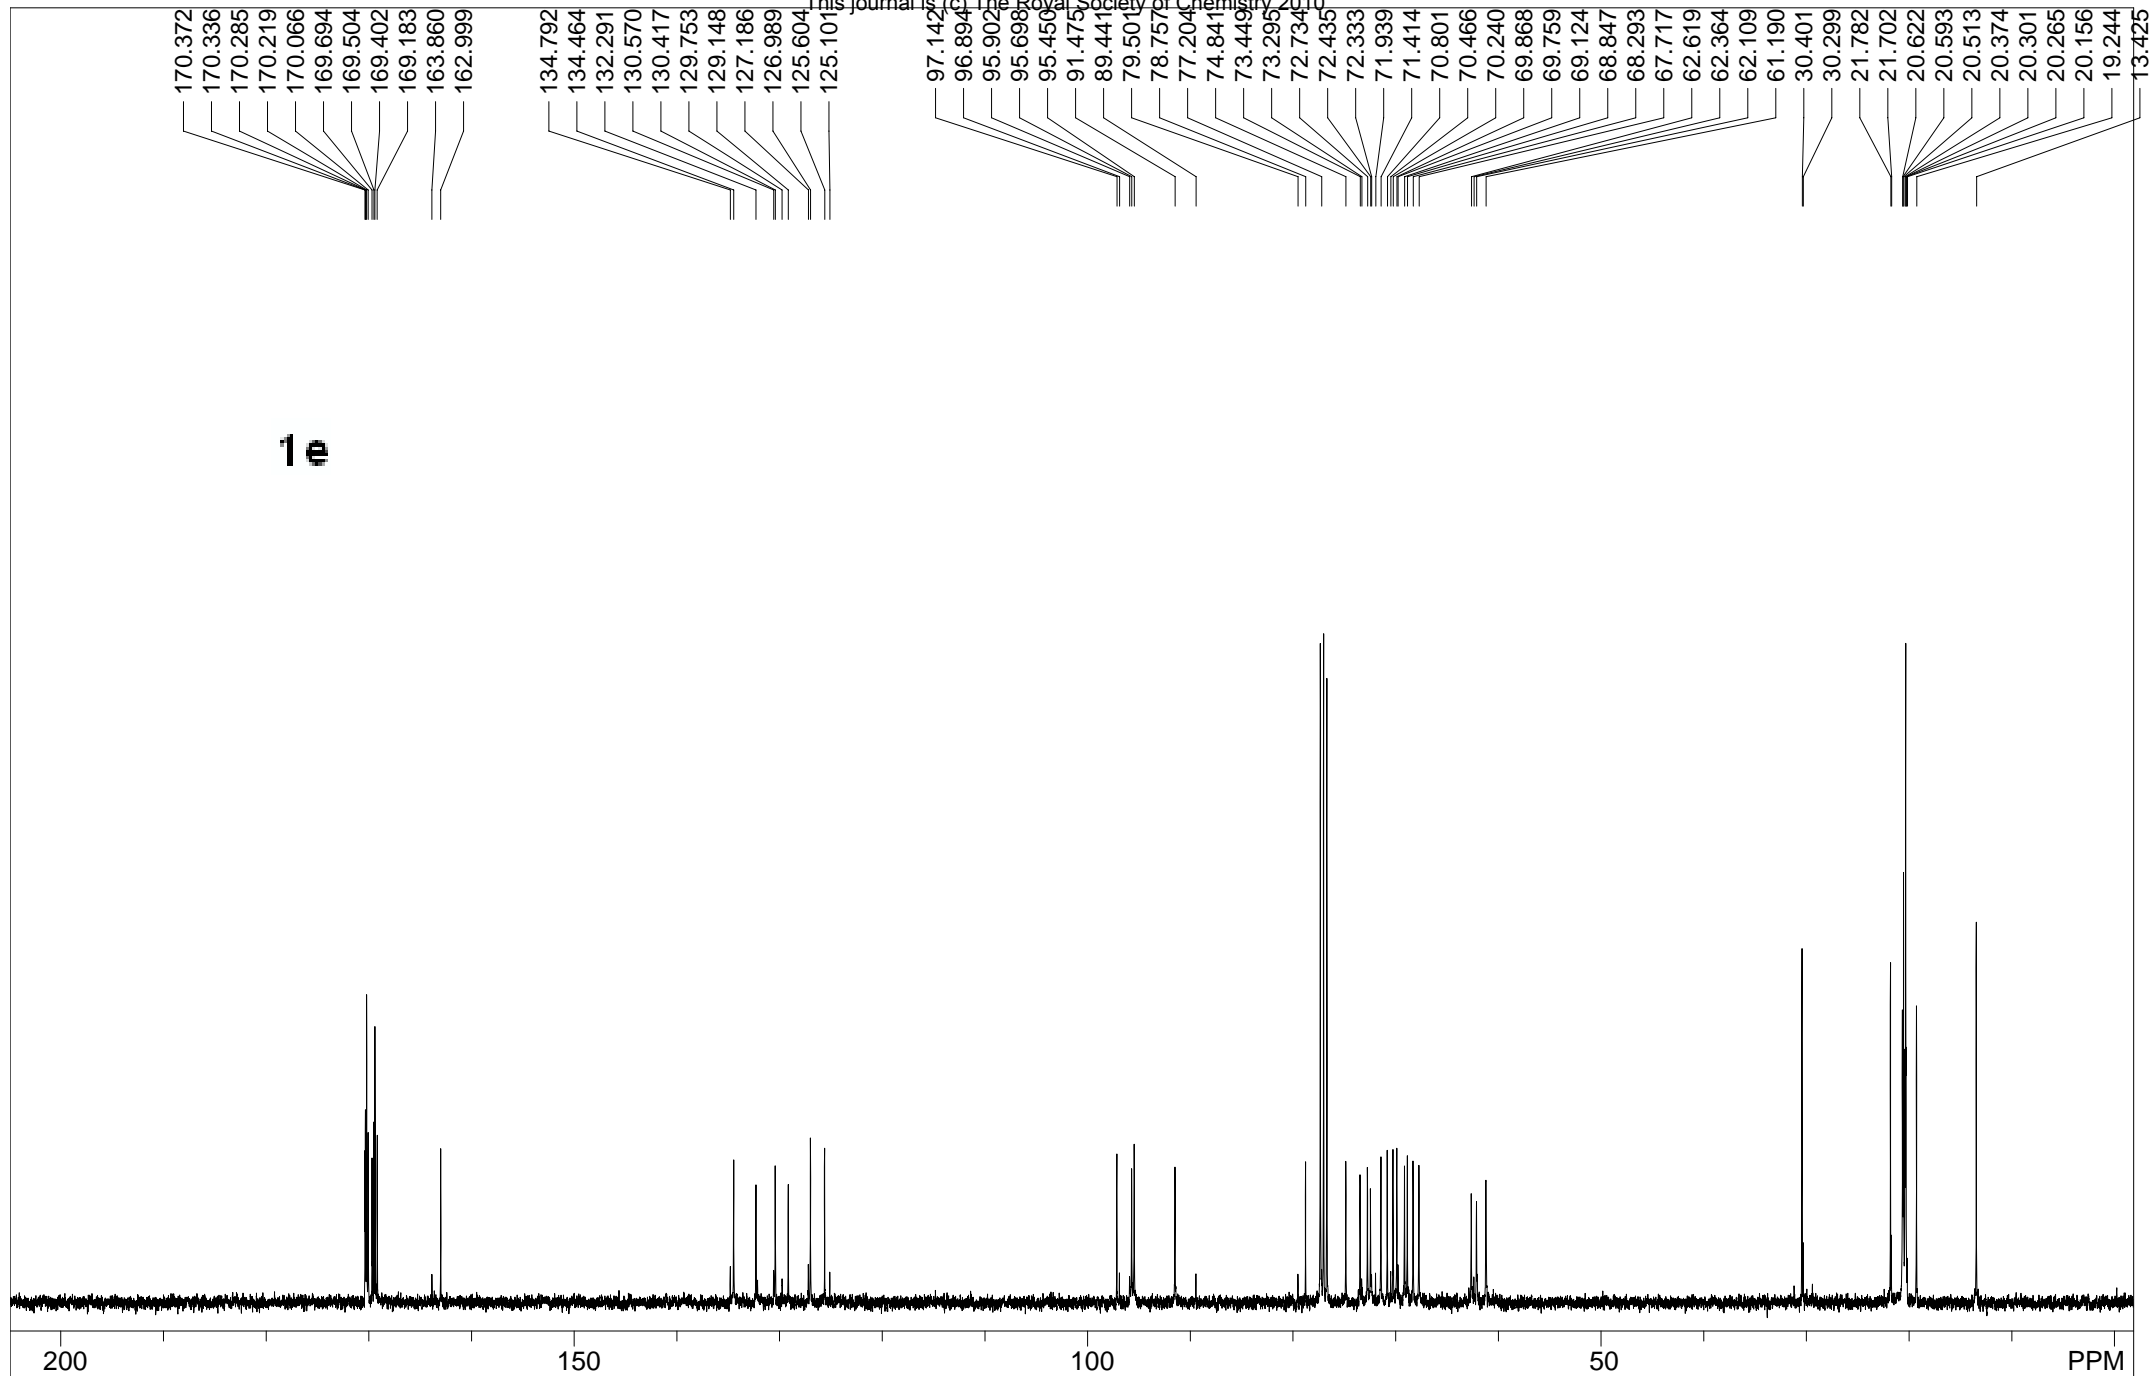

USER: nmr -- DATE: 14:49:17.343 +0800 nmr@EP-ZH107708

|             |           |            |             |              |         |              |                       |
|-------------|-----------|------------|-------------|--------------|---------|--------------|-----------------------|
| F1: 100.610 | F2: 1.000 | SW1: 24038 |             | OF1: 10043.5 |         | PTS1d: 32768 |                       |
| EX: zgpg30  |           | PW: 8.6 us | PD: 2.0 sec | NA: 80       | LB: 1.0 |              | Nuts - \$NMR -1494C.1 |

5.502  
5.477  
5.453  
5.061  
5.036  
5.012  
5.003  
4.980  
4.966  
4.940  
4.392  
4.373  
4.299  
4.288  
4.268  
4.258  
4.122  
4.088  
4.053  
4.036  
4.016  
4.012  
3.659  
3.654  
3.647  
3.503  
3.481  
3.459  
3.375  
3.299  
3.289  
3.272  
3.264  
2.083  
2.042  
2.013

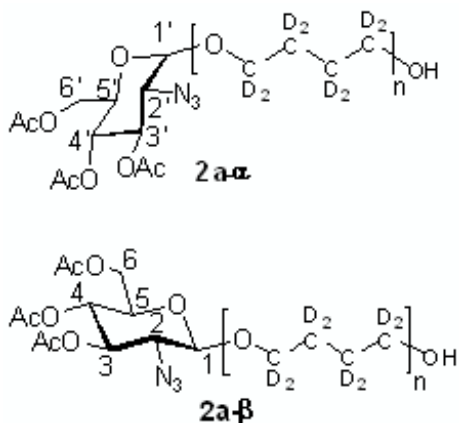

(0.1 M in THF-d<sub>8</sub>, at 2 °C)

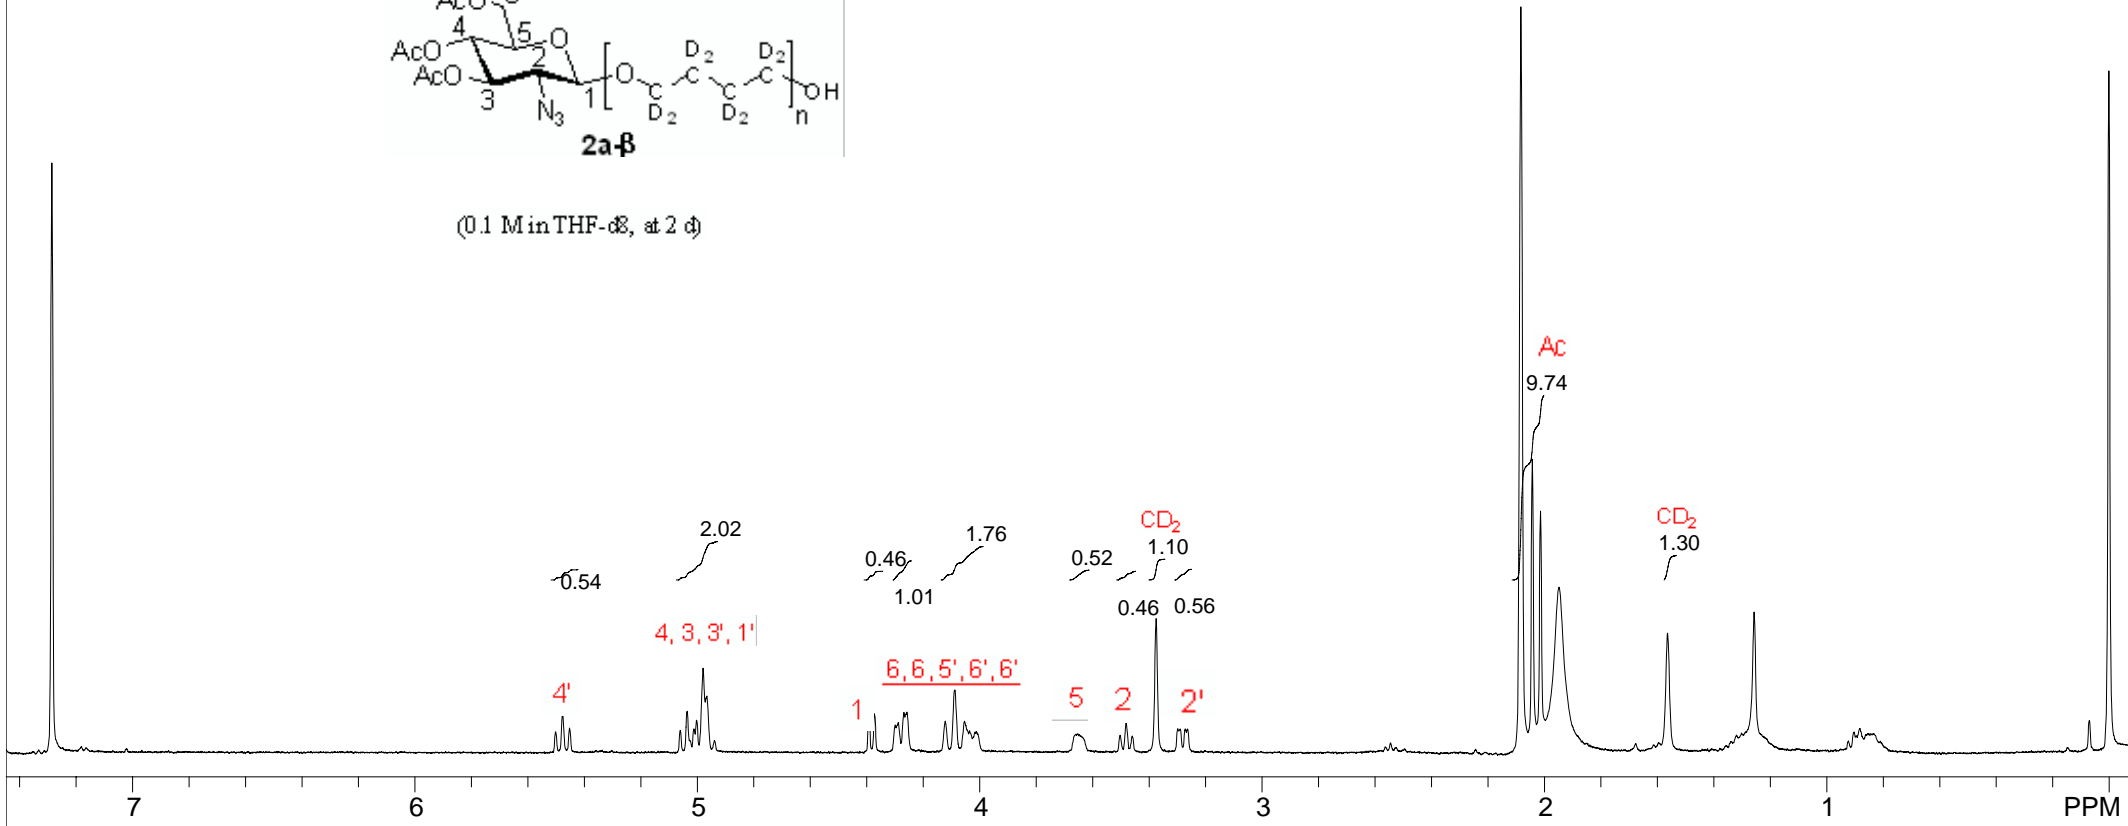

USER: nmr -- DATE: 14:19:42.578 +0800 nmr@EP-ZH107708

|             |            |             |             |                       |
|-------------|------------|-------------|-------------|-----------------------|
| F1: 400.120 | F2: 1.000  | SW1: 8224   | OF1: 2471.5 | PTS1d: 32768          |
| EX: zg30    | PW: 9.3 us | PD: 1.0 sec | NA: 8       | LB: 0.3               |
|             |            |             |             | Nuts - \$NMR -1447-.1 |

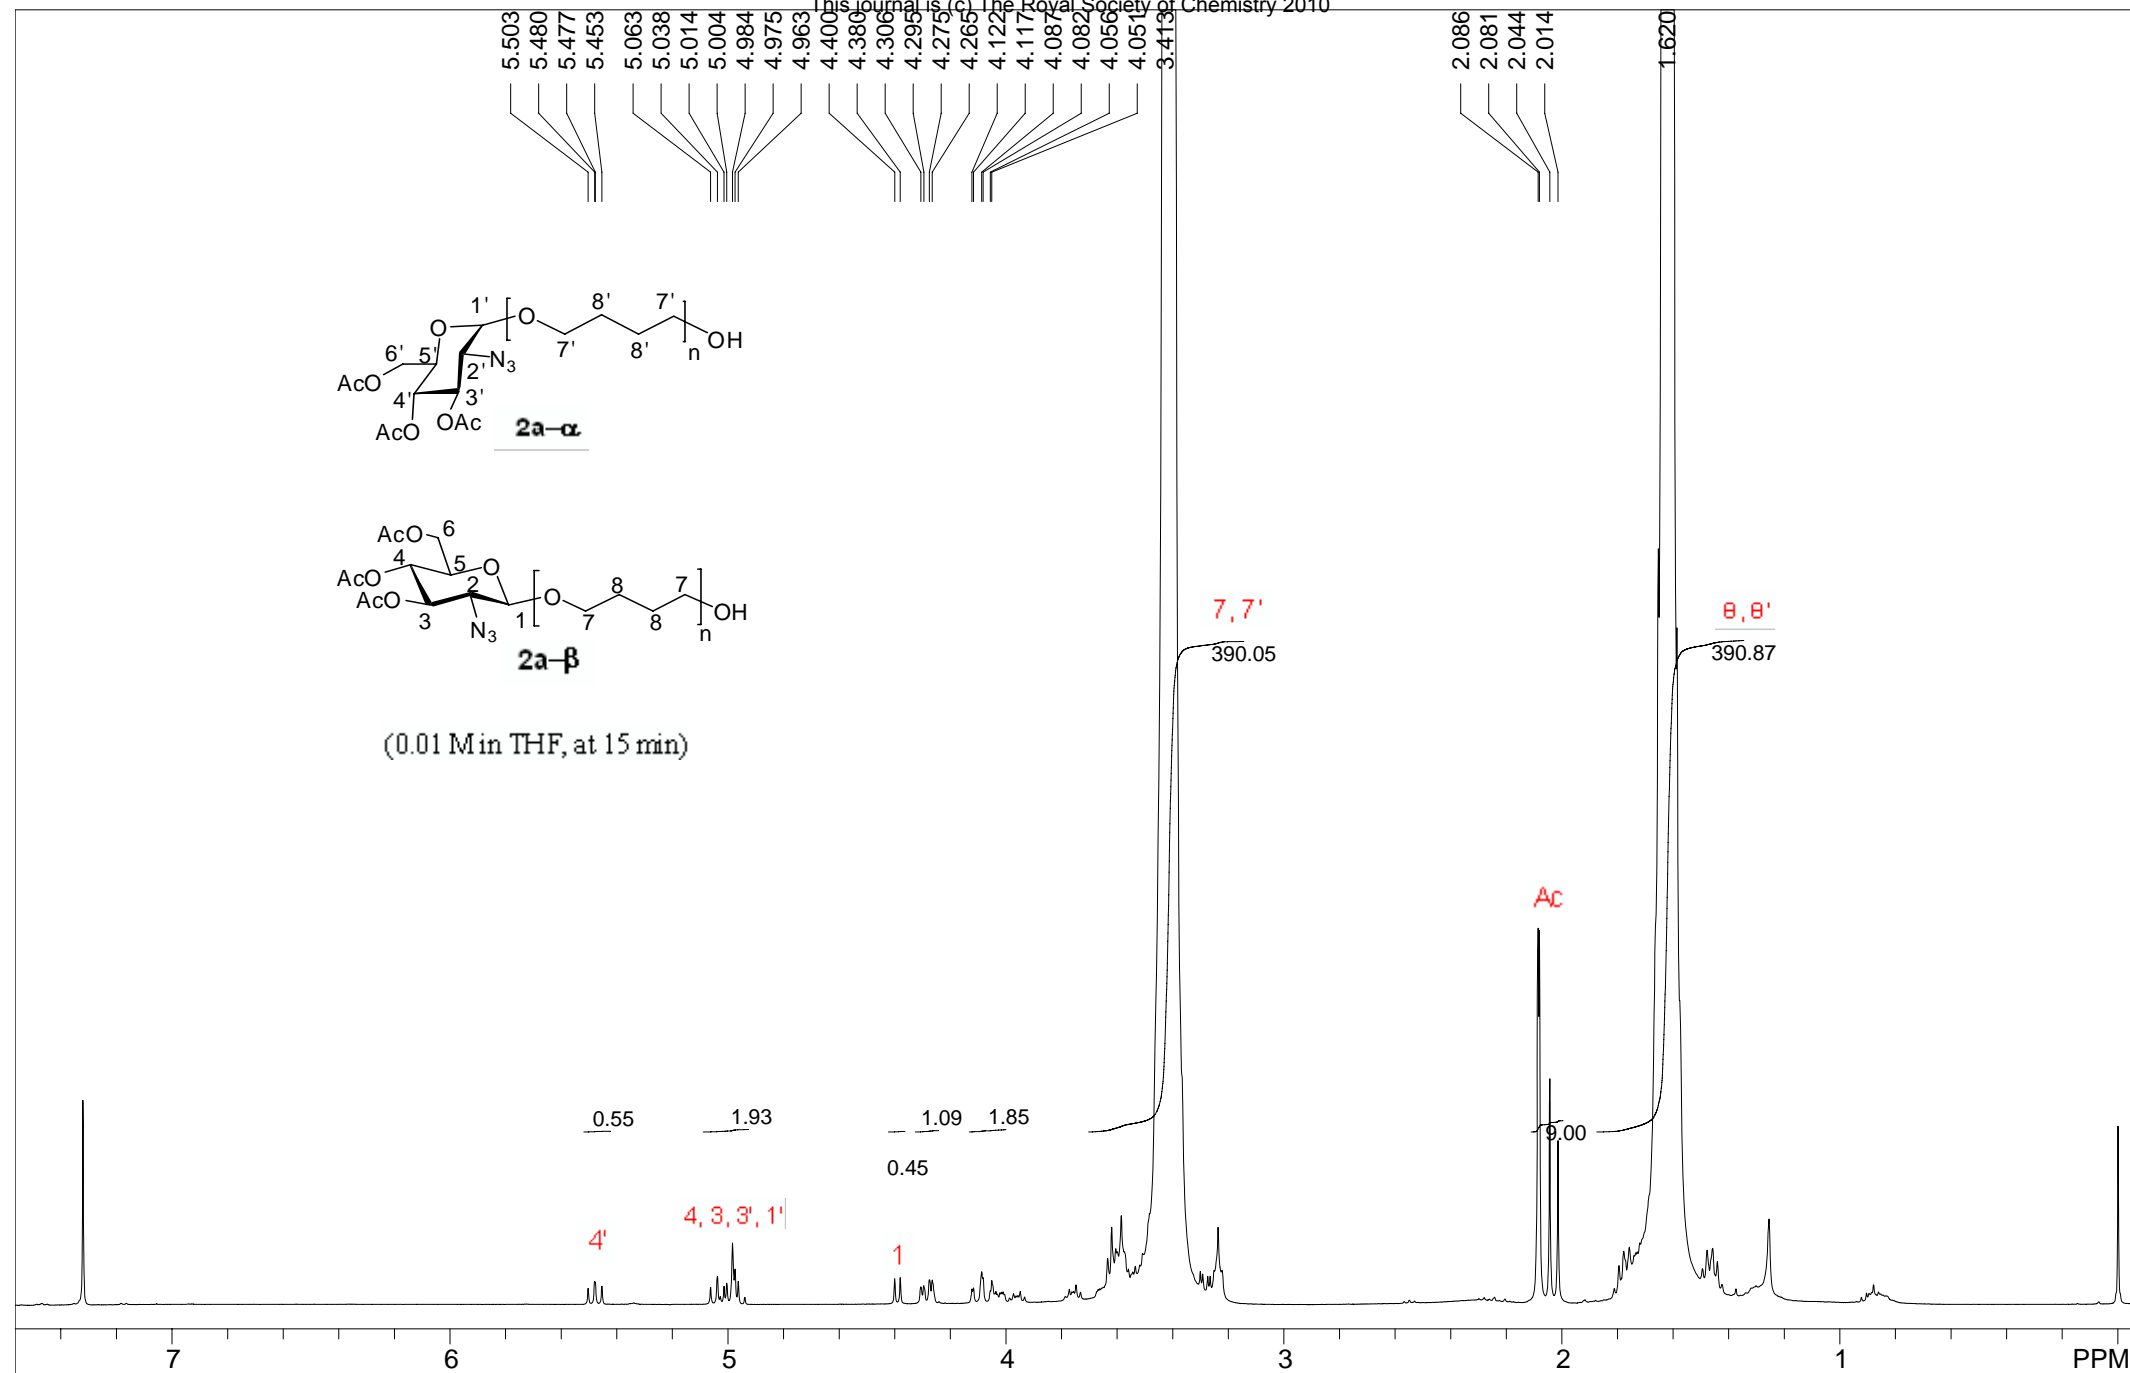

|             |            |             |             |                              |
|-------------|------------|-------------|-------------|------------------------------|
| F1: 400.120 | F2: 1.000  | SW1: 8224   | OF1: 2485.3 | PTS1d: 32768                 |
| EX: zg30    | PW: 9.3 us | PD: 1.0 sec | NA: 16      | LB: 0.3                      |
|             |            |             |             | Nuts - \$2005145-14852P 10.1 |

USER: nmr -- DATE: 14:20:11.781 +0800 nmr@EP-ZH107708

1-857  
11

2a

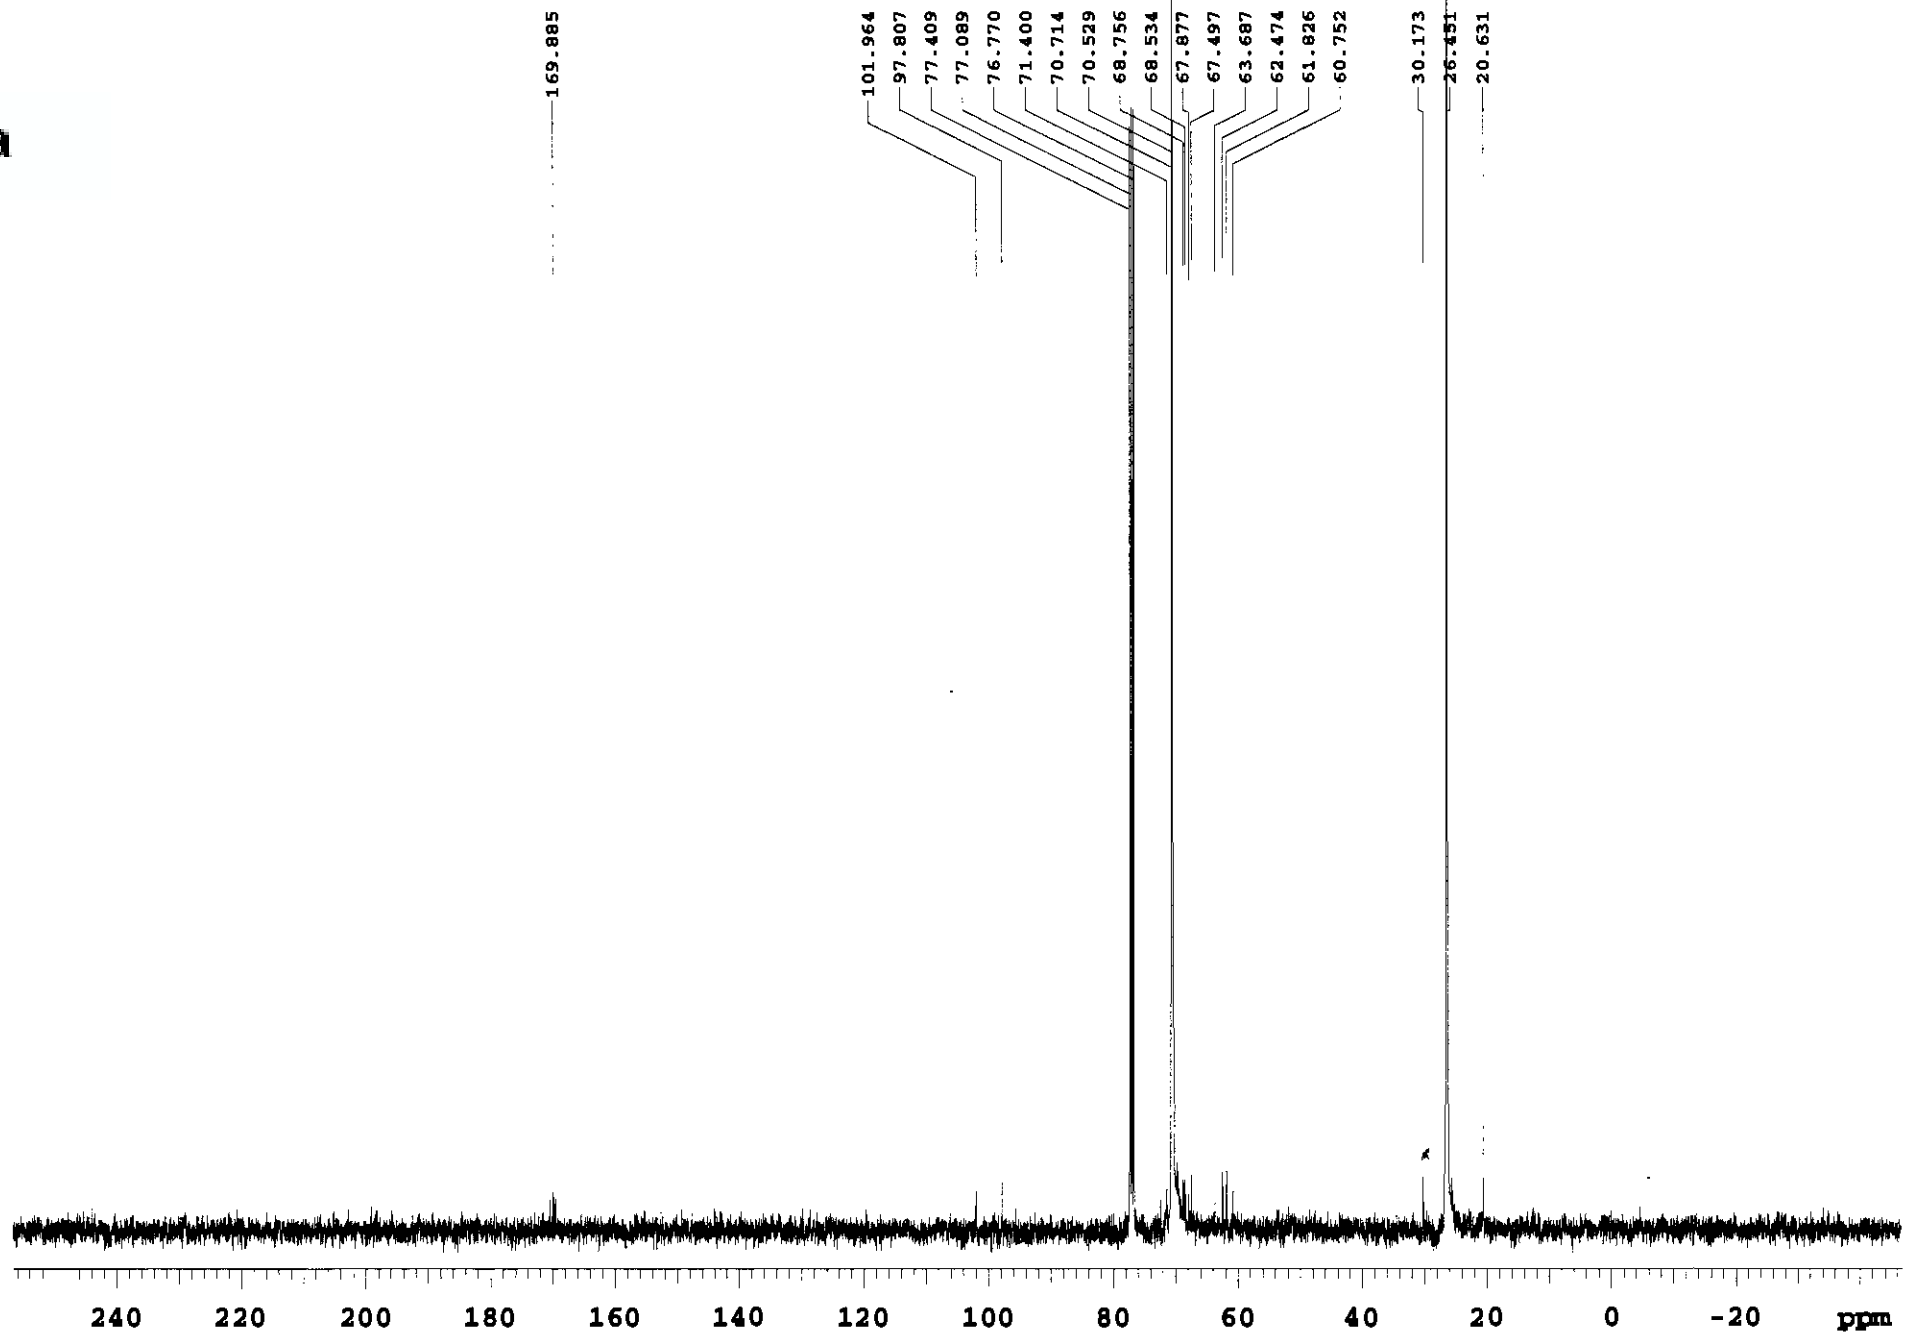

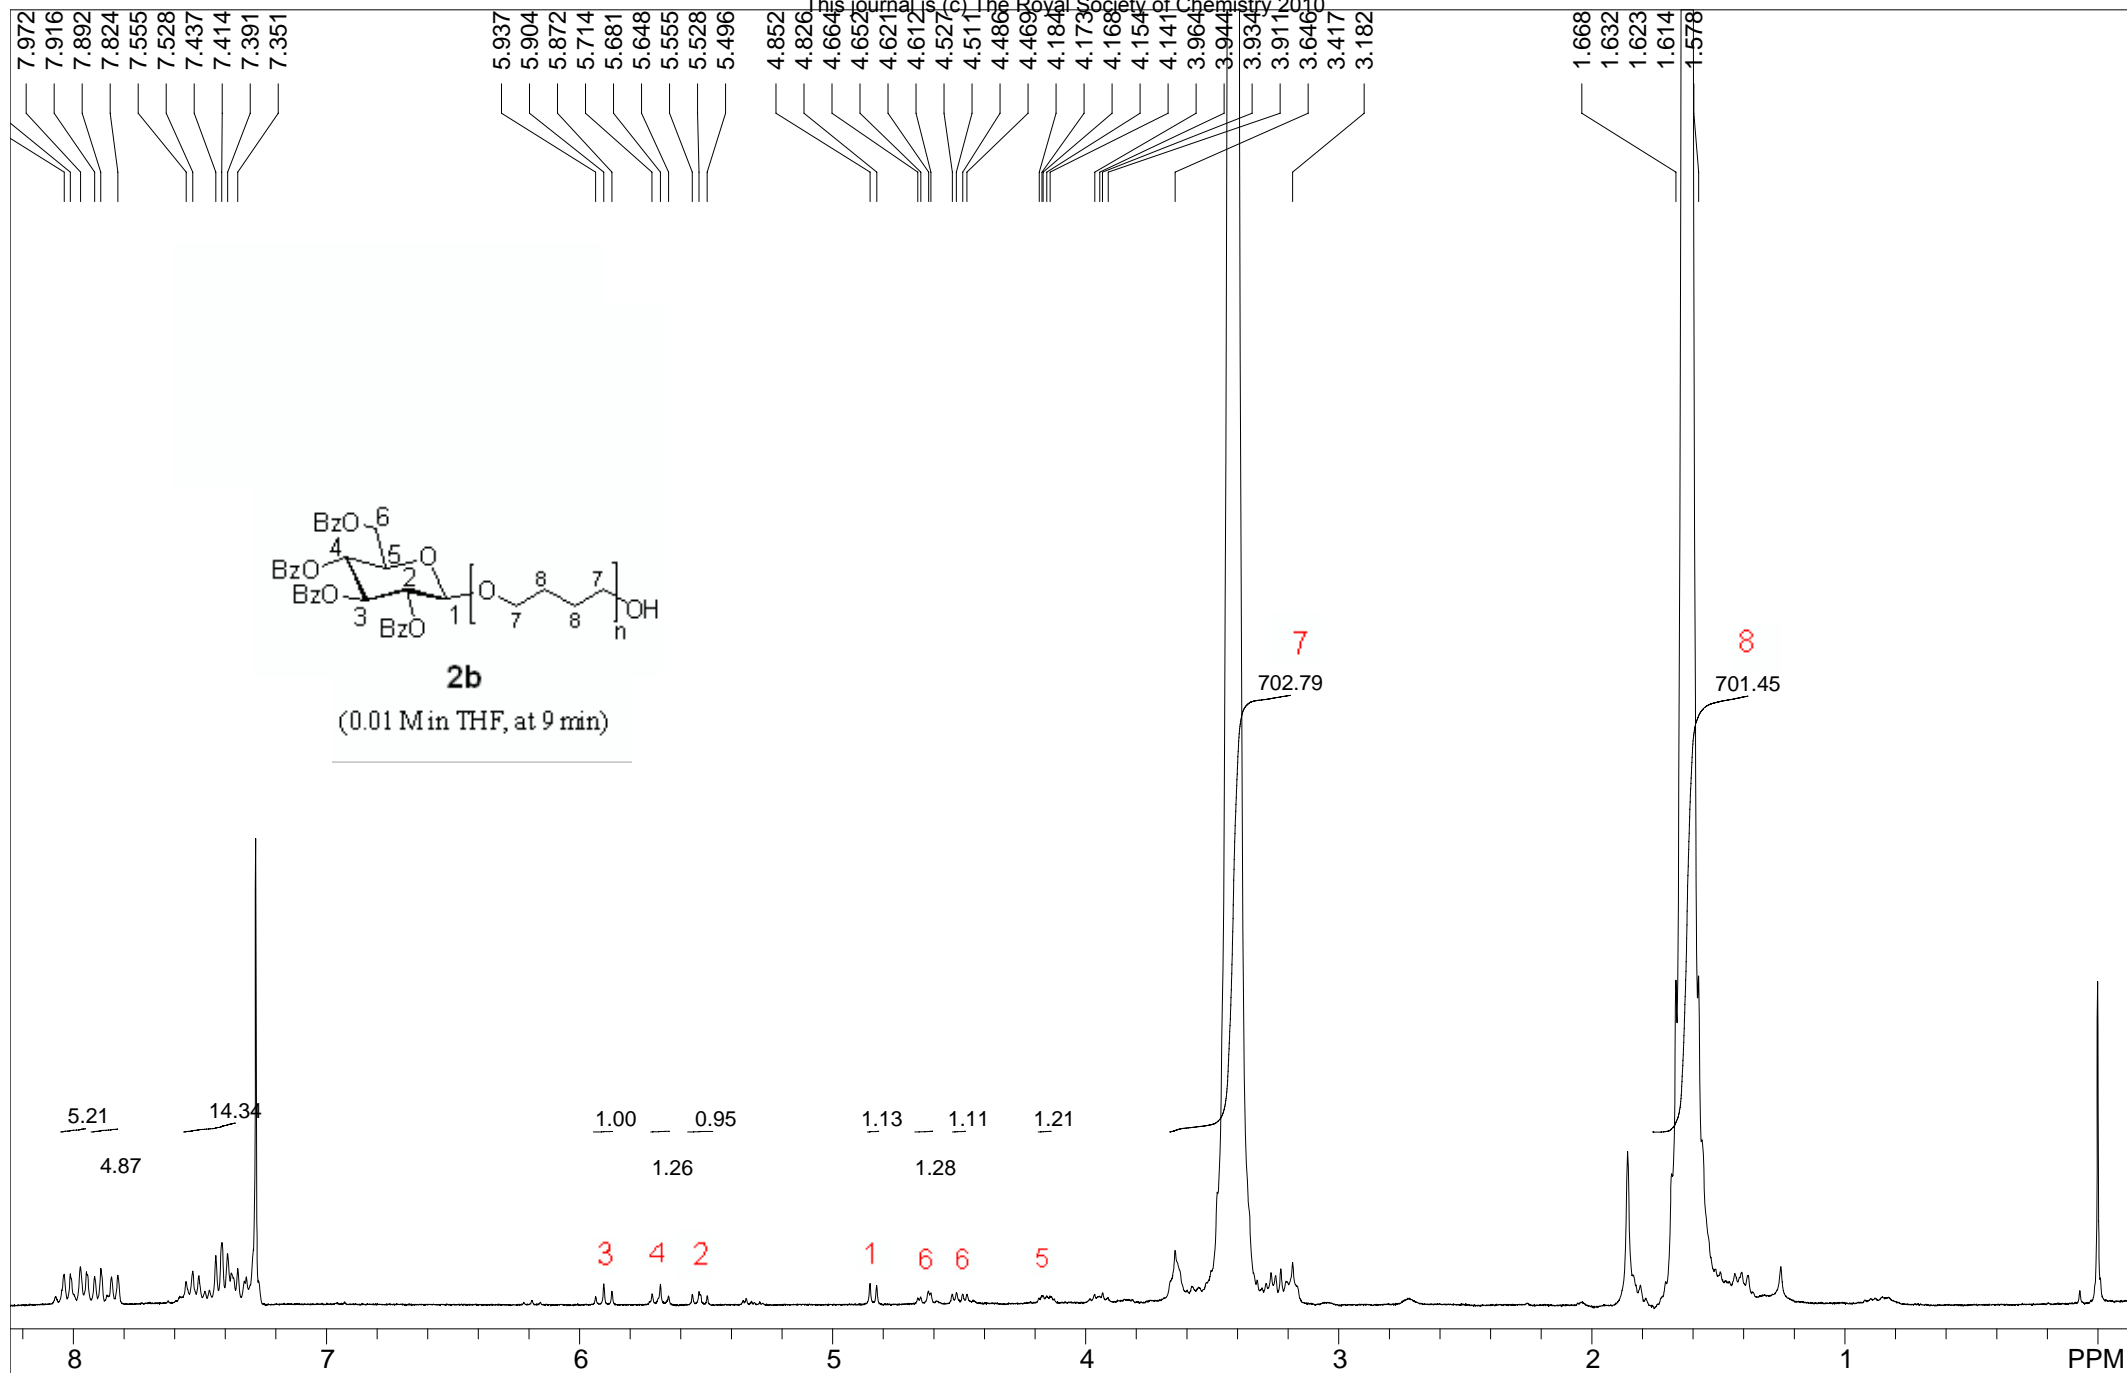

:blank line

USER: -- DATE: Jan 8 2010

F1: 300.055

F2: 75.456

SW1: 4803

OF1: 1808.2

PTS1d: 9587, 16384

EX: s2pul

PW: 5.8 us

PD: 1.0 sec

NA: 32

LB: 0.0

Nuts - \$14812PTH\_08Jan2010

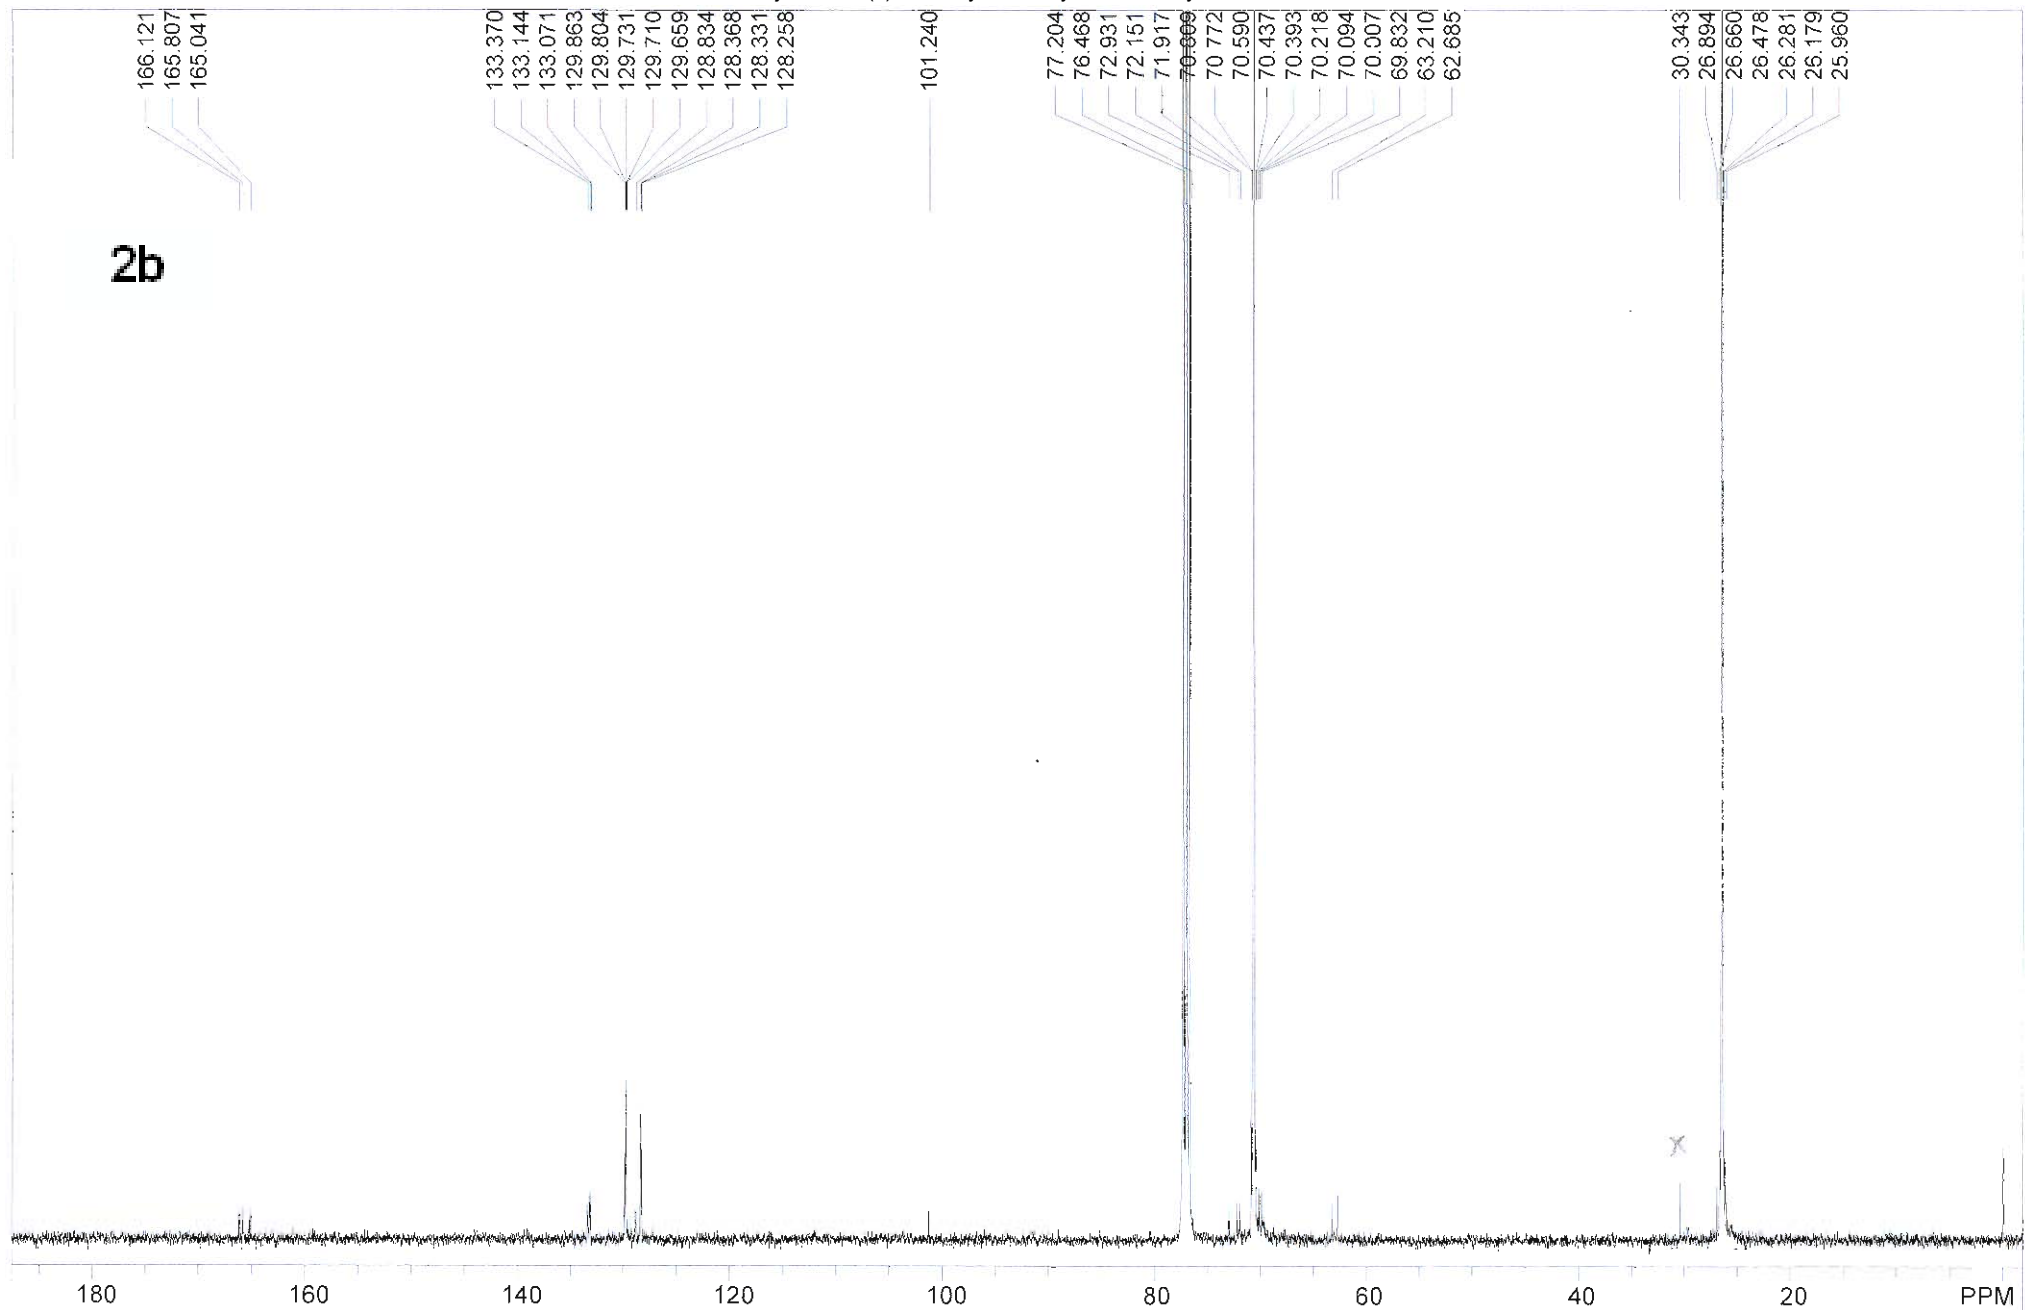

|                                                       |           |            |              |              |                                |
|-------------------------------------------------------|-----------|------------|--------------|--------------|--------------------------------|
| USER: nmr -- DATE: 08:03:11.484 +0800 nmr@EP-ZH107708 |           |            |              |              |                                |
| F1: 100.610                                           | F2: 1.000 | SW1: 24038 | QF1: 10057.5 | PTS1d: 32768 |                                |
| EX: zgpg30                                            |           | PW: 8.6 us | PD: 2.0 sec  | NA: 8192     | LB: 1.0                        |
|                                                       |           |            |              |              | Nuts - \$20051451481-2ptC_10.1 |

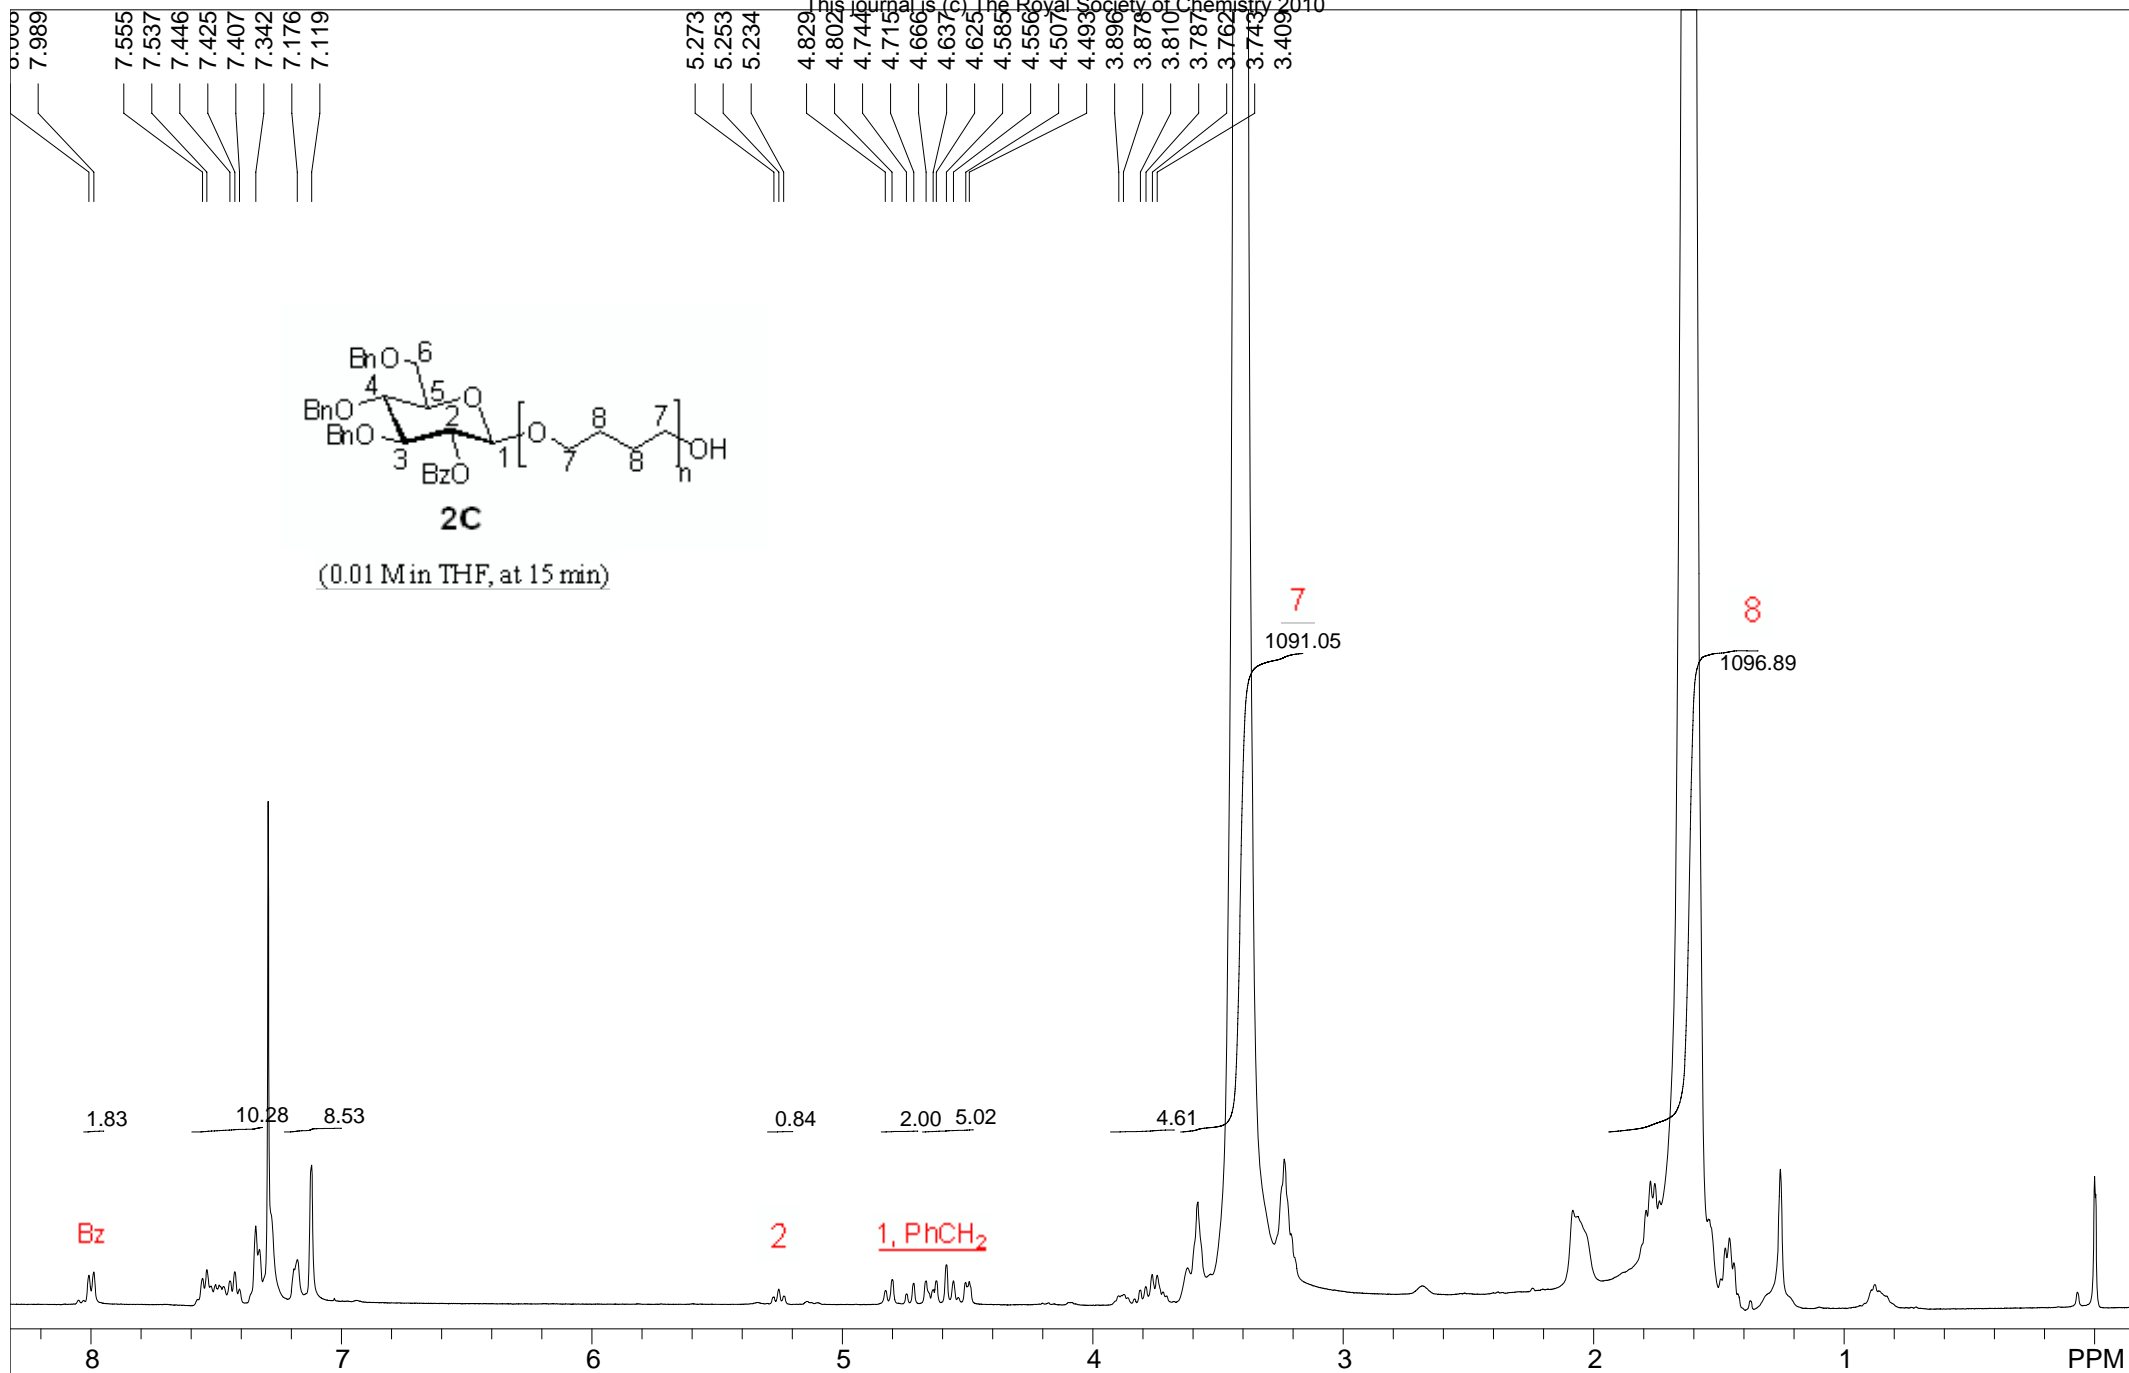

USER: nmr -- DATE: 15:32:27.265 +0800 nmr@EP-ZH107708

|             |            |             |             |                               |
|-------------|------------|-------------|-------------|-------------------------------|
| F1: 400.120 | F2: 1.000  | SW1: 8224   | OF1: 2474.0 | PTS1d: 32768                  |
| EX: zg30    | PW: 9.3 us | PD: 1.0 sec | NA: 32      | LB: 0.3                       |
|             |            |             |             | Nuts - \$2005145-1484-2P 10.1 |

1484-2P  
李浩

2C

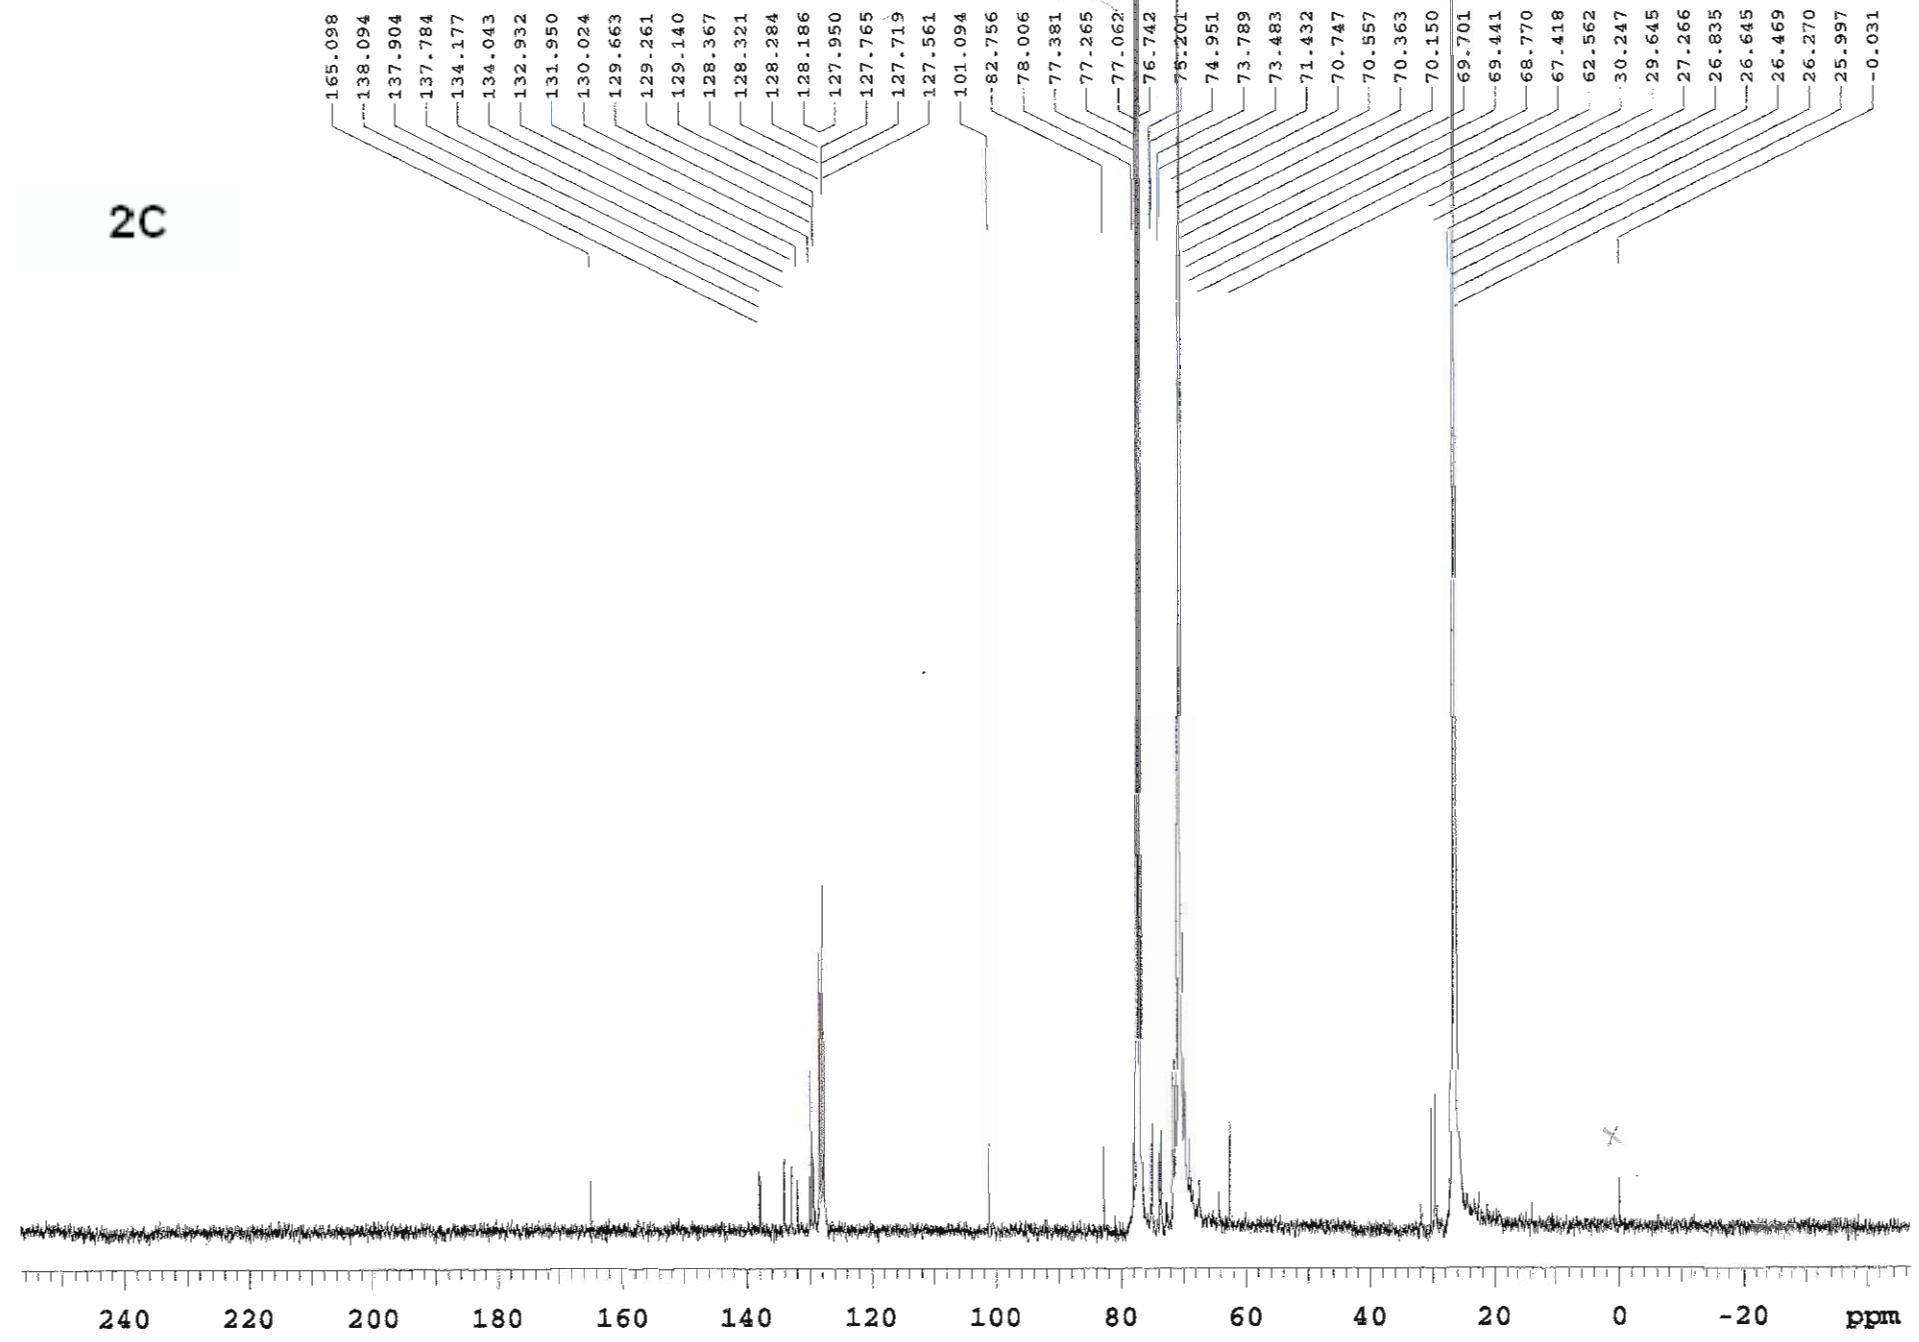



7.843  
7.735  
7.728  
7.722  
7.716  
7.378  
7.368

5.810  
5.786  
5.761  
5.418  
5.397  
5.371  
5.347  
5.321  
5.260  
5.251  
5.007  
4.983  
4.958  
4.664  
4.218  
4.191  
4.177  
4.171  
4.157  
4.147  
4.087  
4.063  
4.040  
4.009  
4.003  
3.856  
3.817  
3.799  
3.412  
3.399

2.050  
2.042  
2.018  
1.890  
1.652  
1.618  
1.586  
1.575

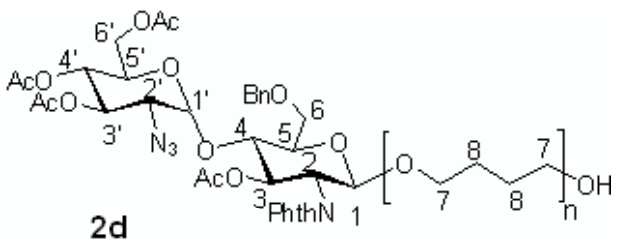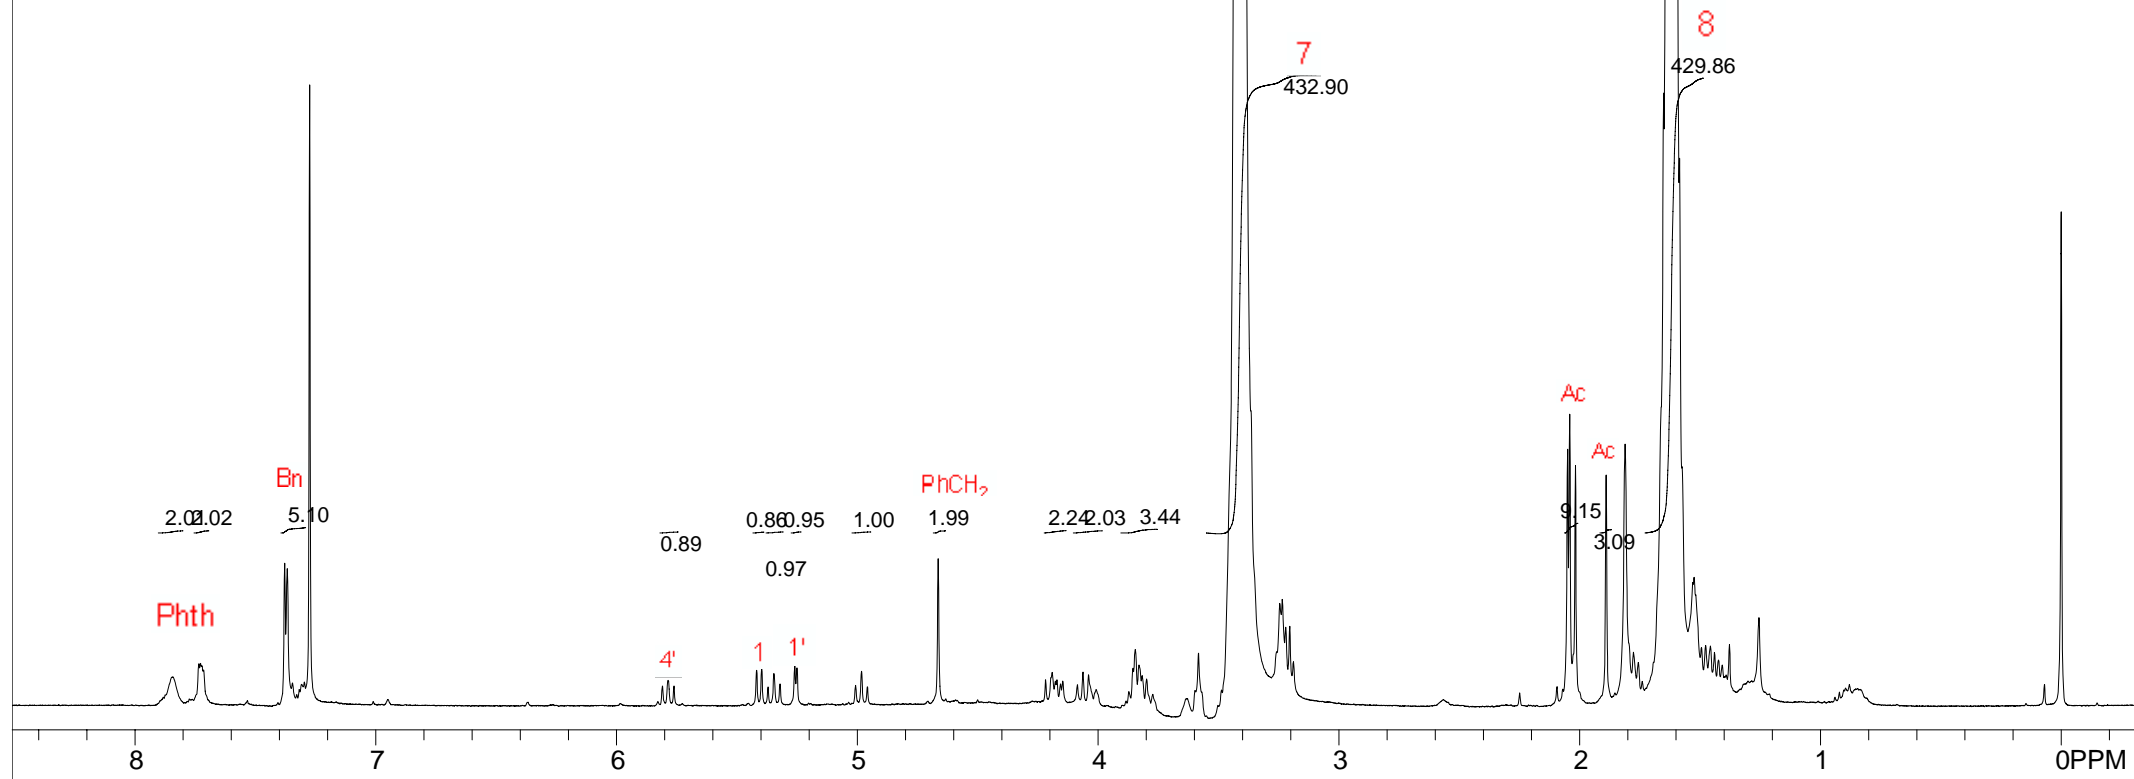

USER: nmr -- DATE: 16:27:23.359 +0800 nmr@EP-ZH107708

|             |            |             |             |                           |
|-------------|------------|-------------|-------------|---------------------------|
| F1: 400.120 | F2: 1.000  | SW1: 8224   | OF1: 2466.9 | PTS1d: 32768              |
| EX: zg30    | PW: 9.3 us | PD: 1.0 sec | NA: 16      | LB: 0.3                   |
|             |            |             |             | Nuts - \$NMR -1491-2p--.1 |

1491-2  
329

2d

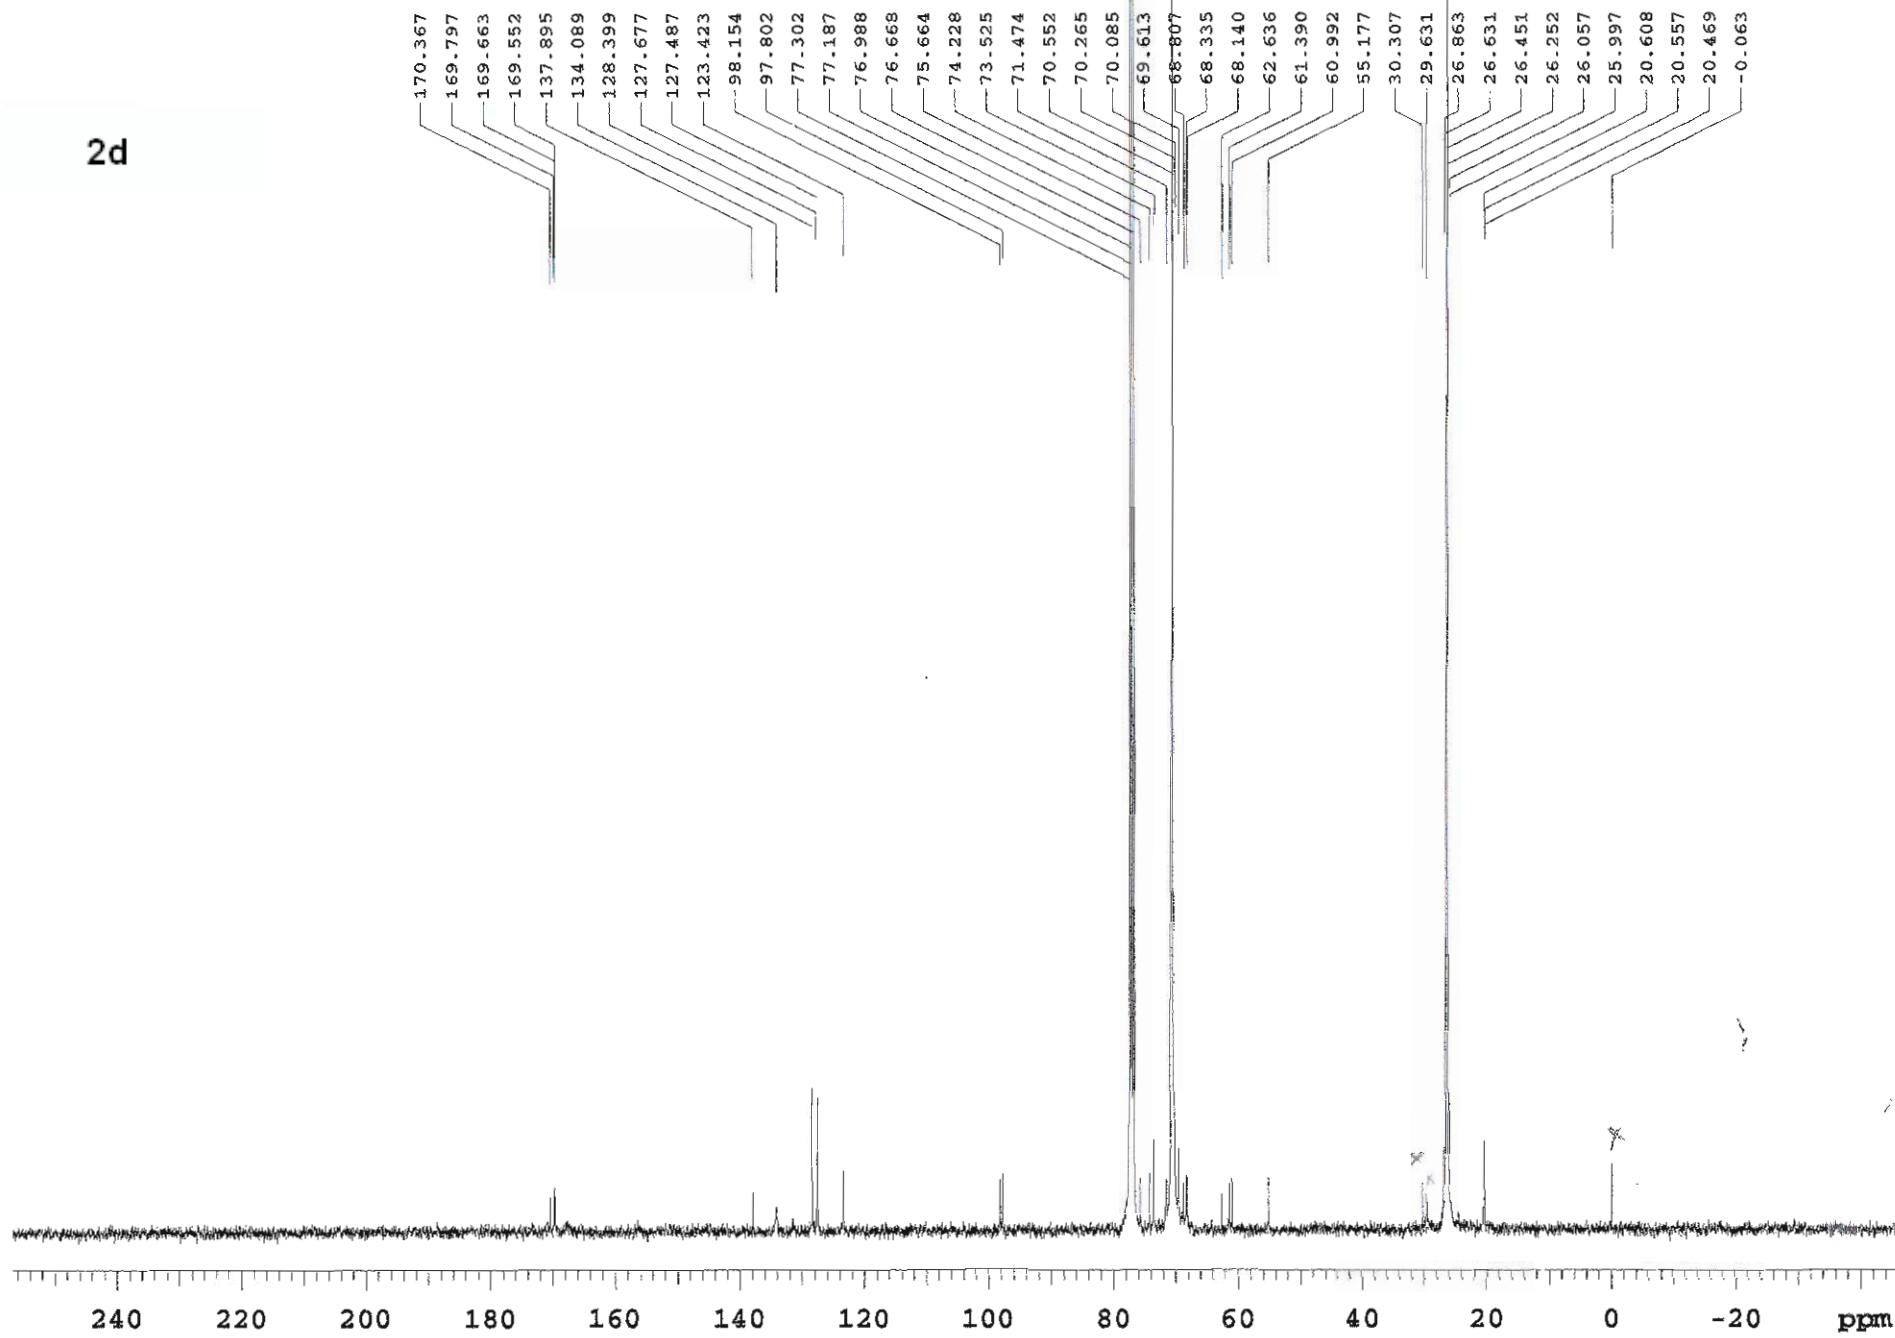

5.544 5.521 5.497 5.442 5.419 5.411 5.402 5.384 5.361 5.336 5.287 5.279 5.254 5.232 5.094 5.070 5.045 4.949 4.940 4.874 4.865 4.848 4.838 4.819 4.798 4.775 4.757 4.708 4.520 4.505 4.469 4.442 4.419 4.336 4.324 4.311 4.293 4.271 4.240 4.200 4.171 4.088 4.071 4.040 4.012 3.980 3.929 3.907 3.719 3.696 3.375 2.176 2.157 2.099 2.065 2.055 2.043 2.033 2.018 2.004 1.984 1.564

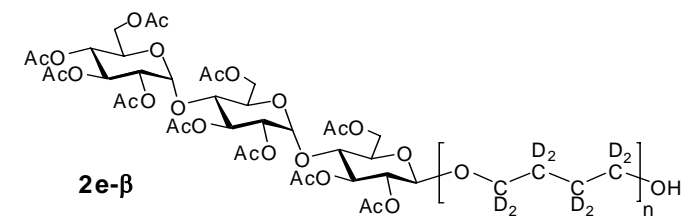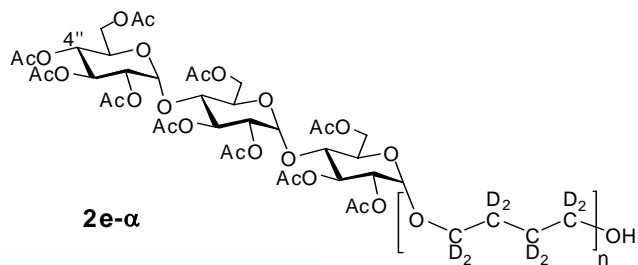

(0.1 M in THF-d<sub>8</sub>, at 15 min)

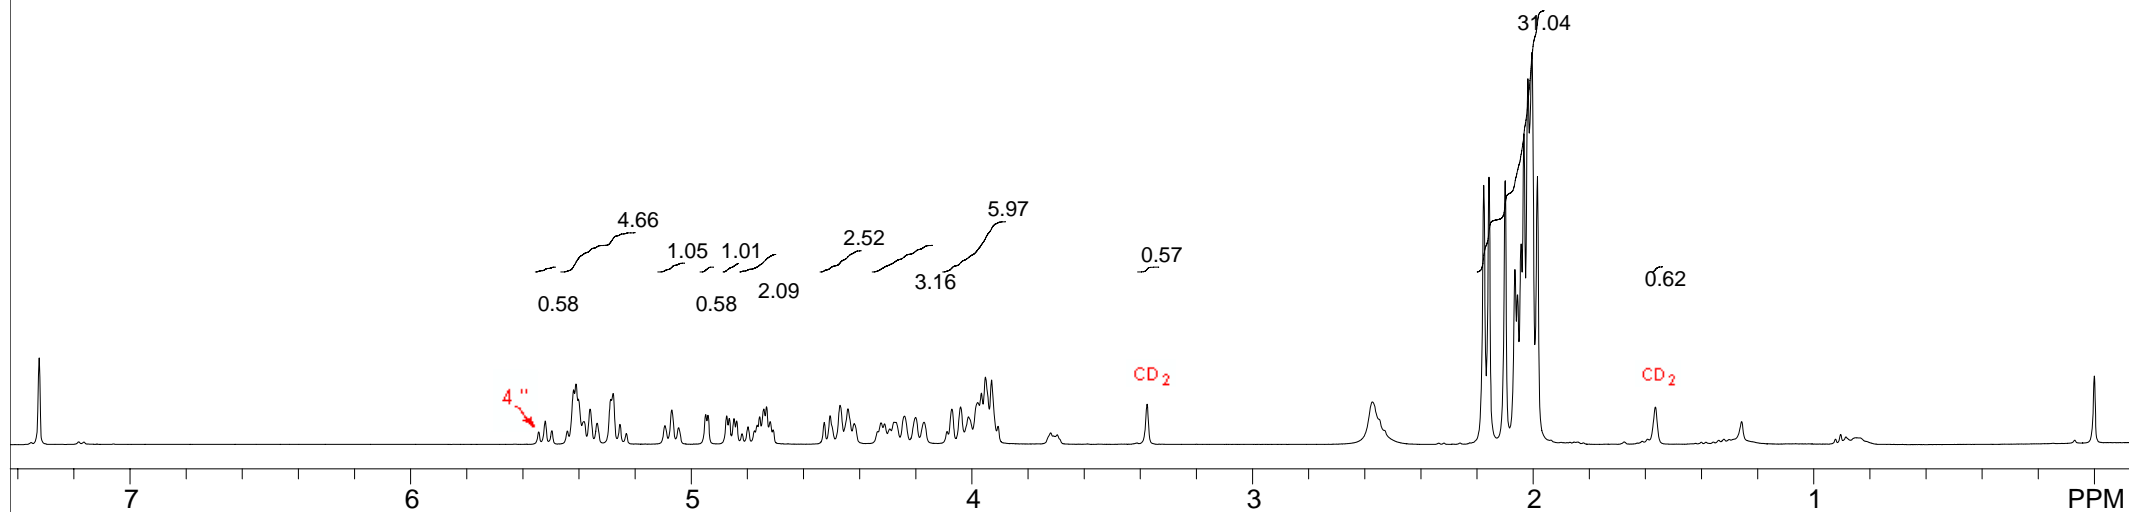

USER: nmr -- DATE: 16:41:32.234 +0800 nmr@EP-ZH107708

|             |            |             |             |                      |
|-------------|------------|-------------|-------------|----------------------|
| F1: 400.120 | F2: 1.000  | SW1: 8224   | OF1: 2486.9 | PTS1d: 32768         |
| EX: zg30    | PW: 9.3 us | PD: 1.0 sec | NA: 16      | LB: 0.3              |
|             |            |             |             | Nuts - \$NMR -1511.1 |

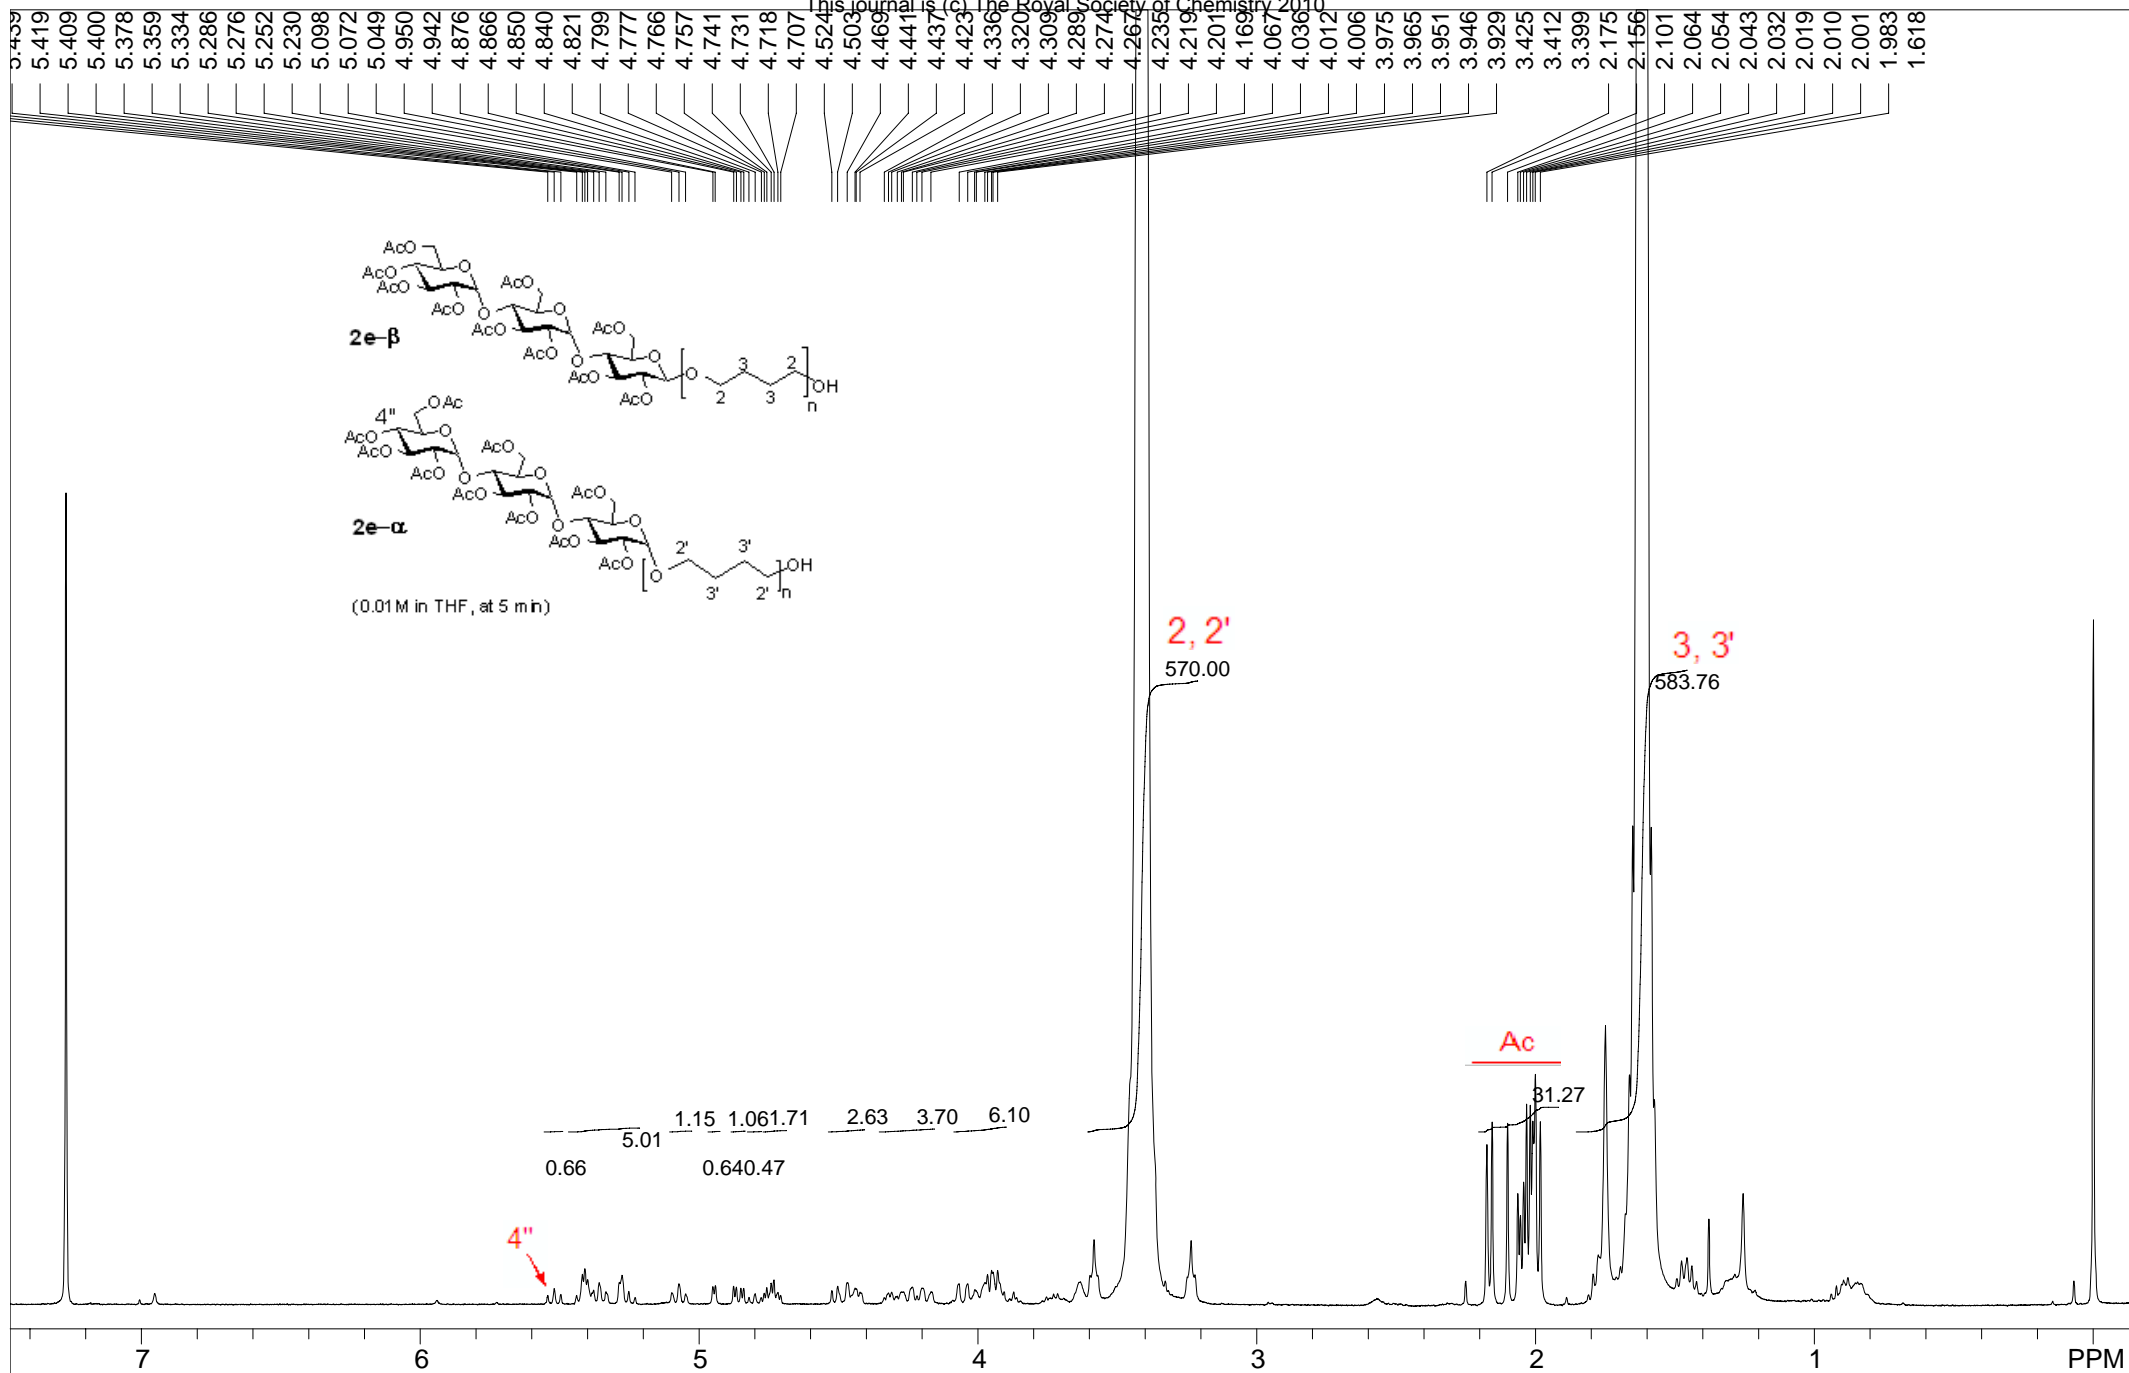

USER: nmr -- DATE: 16:39:59.453 +0800 nmr@EP-ZH107708

|             |            |             |             |                           |
|-------------|------------|-------------|-------------|---------------------------|
| F1: 400.120 | F2: 1.000  | SW1: 8224   | OF1: 2465.2 | PTS1d: 32768              |
| EX: zg30    | PW: 9.3 us | PD: 1.0 sec | NA: 16      | LB: 0.3                   |
|             |            |             |             | Nuts - \$NMR -1495-1p--.1 |

2e

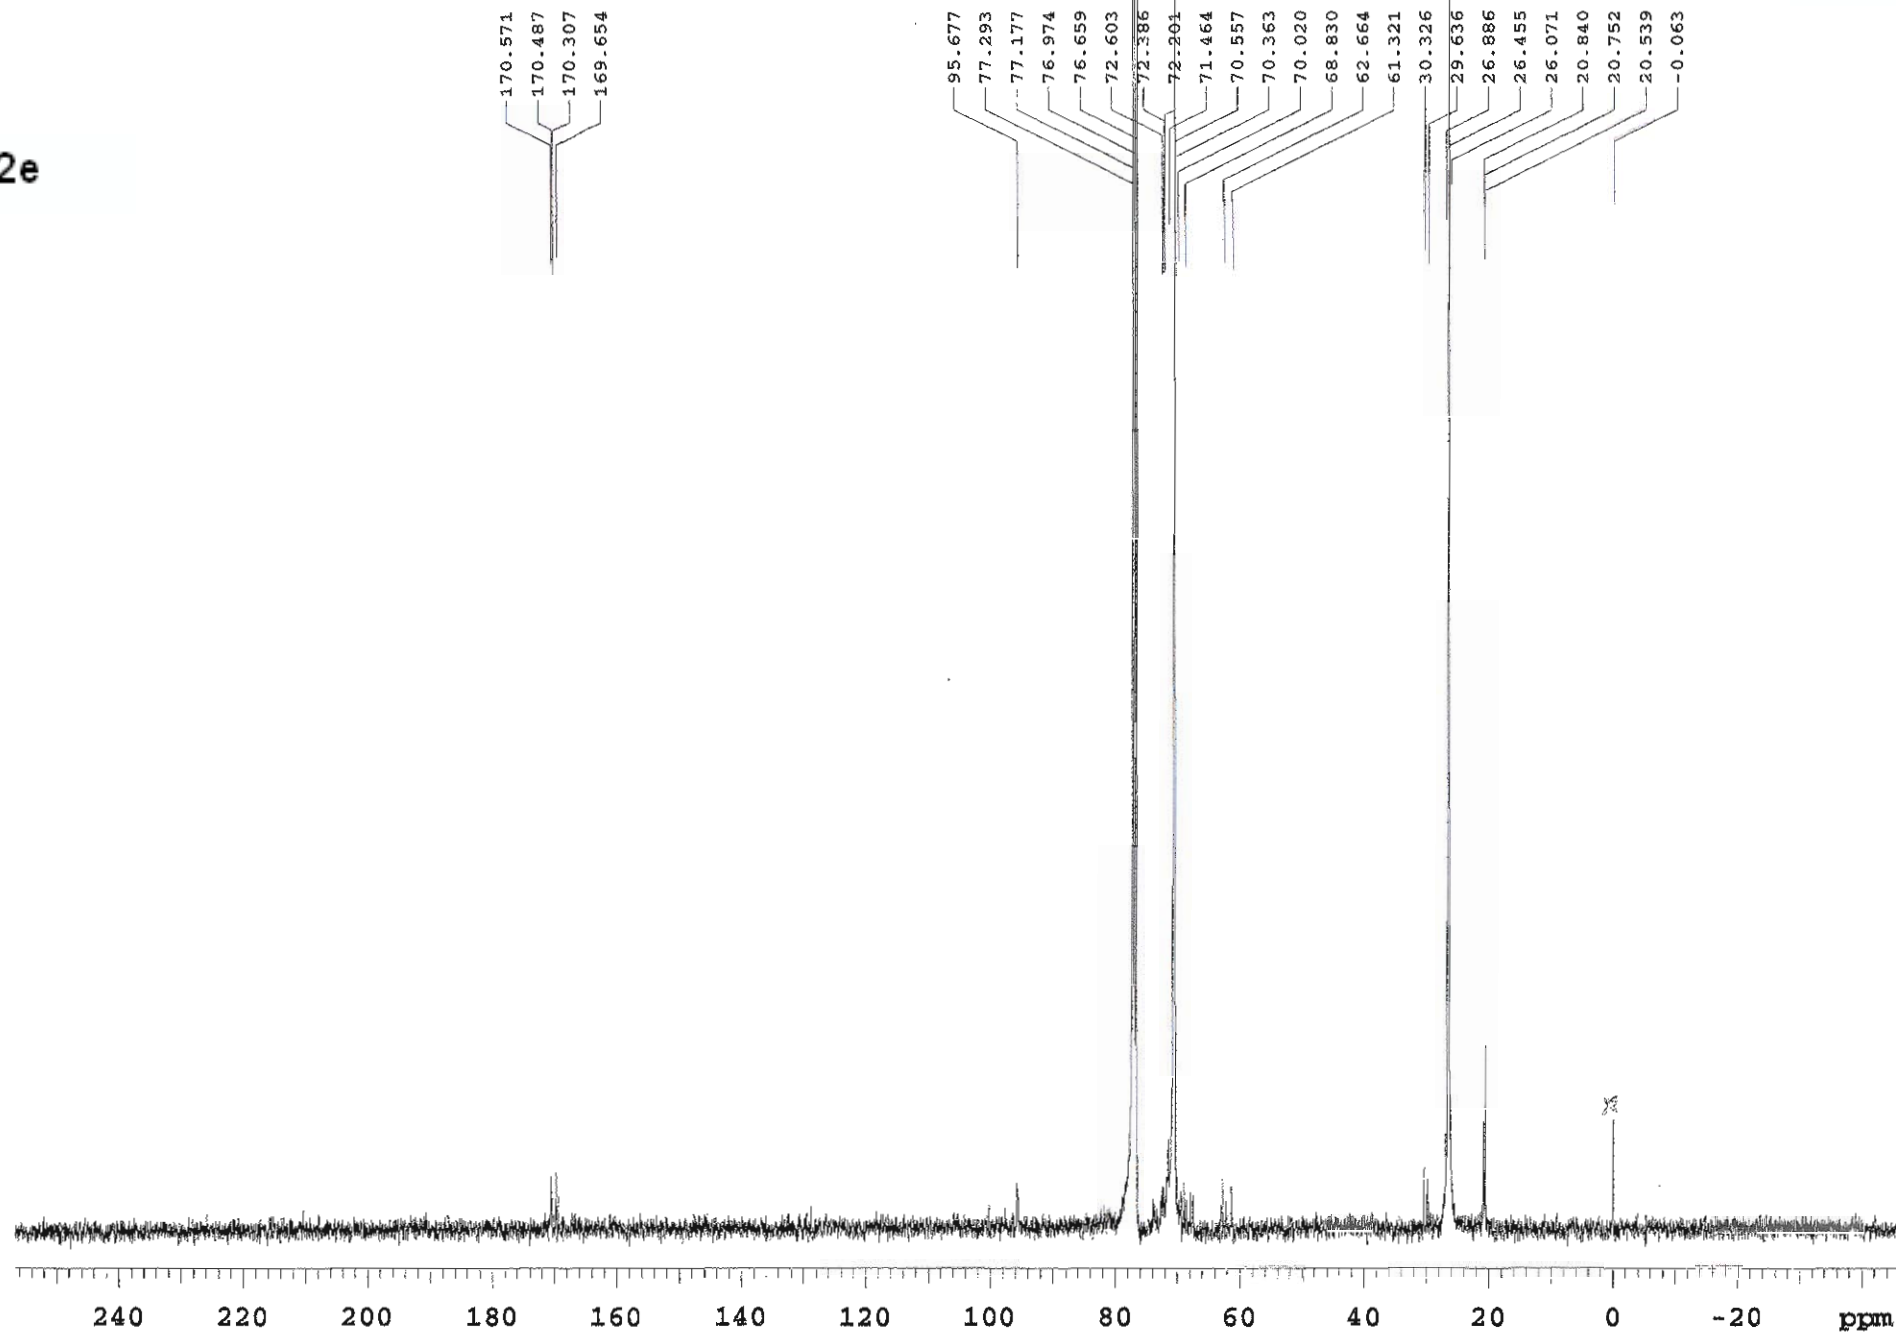

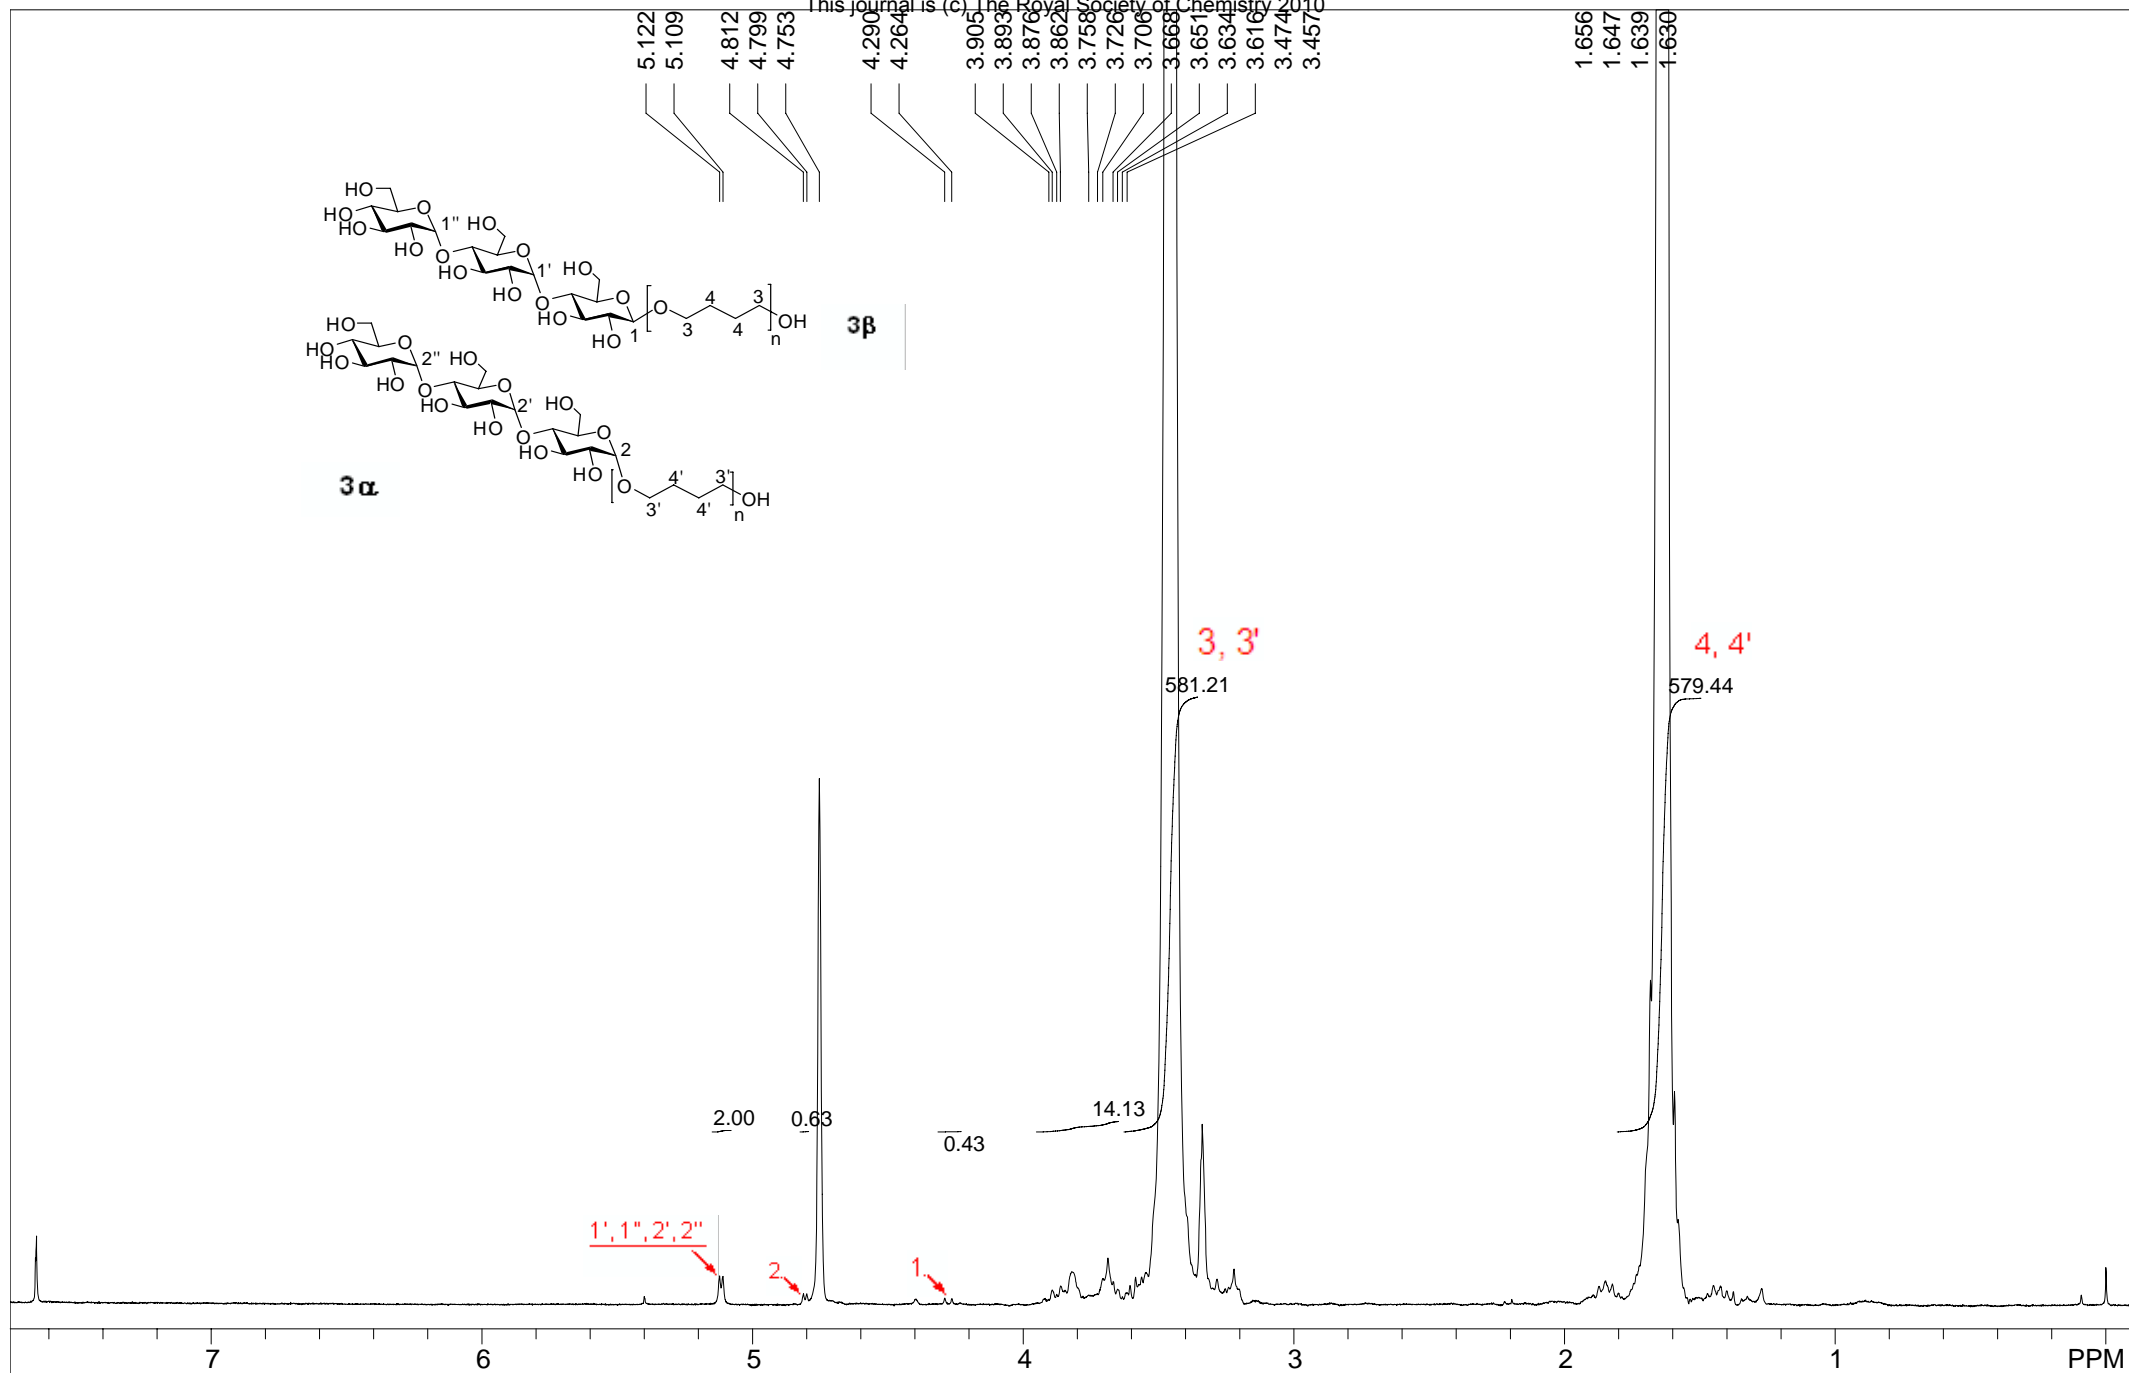

|             |            |             |  |                            |         |                            |  |
|-------------|------------|-------------|--|----------------------------|---------|----------------------------|--|
| :blank line |            |             |  | USER: -- DATE: Dec 31 2009 |         |                            |  |
| F1: 300.055 | F2: 75.456 | SW1: 4803   |  | OF1: 629.0                 |         | PTS1d: 9587 , 16384        |  |
| EX: s2pul   | PW: 5.8 us | PD: 1.0 sec |  | NA: 8                      | LB: 0.0 | Nuts - \$-14100p 31Dec2009 |  |

**3**

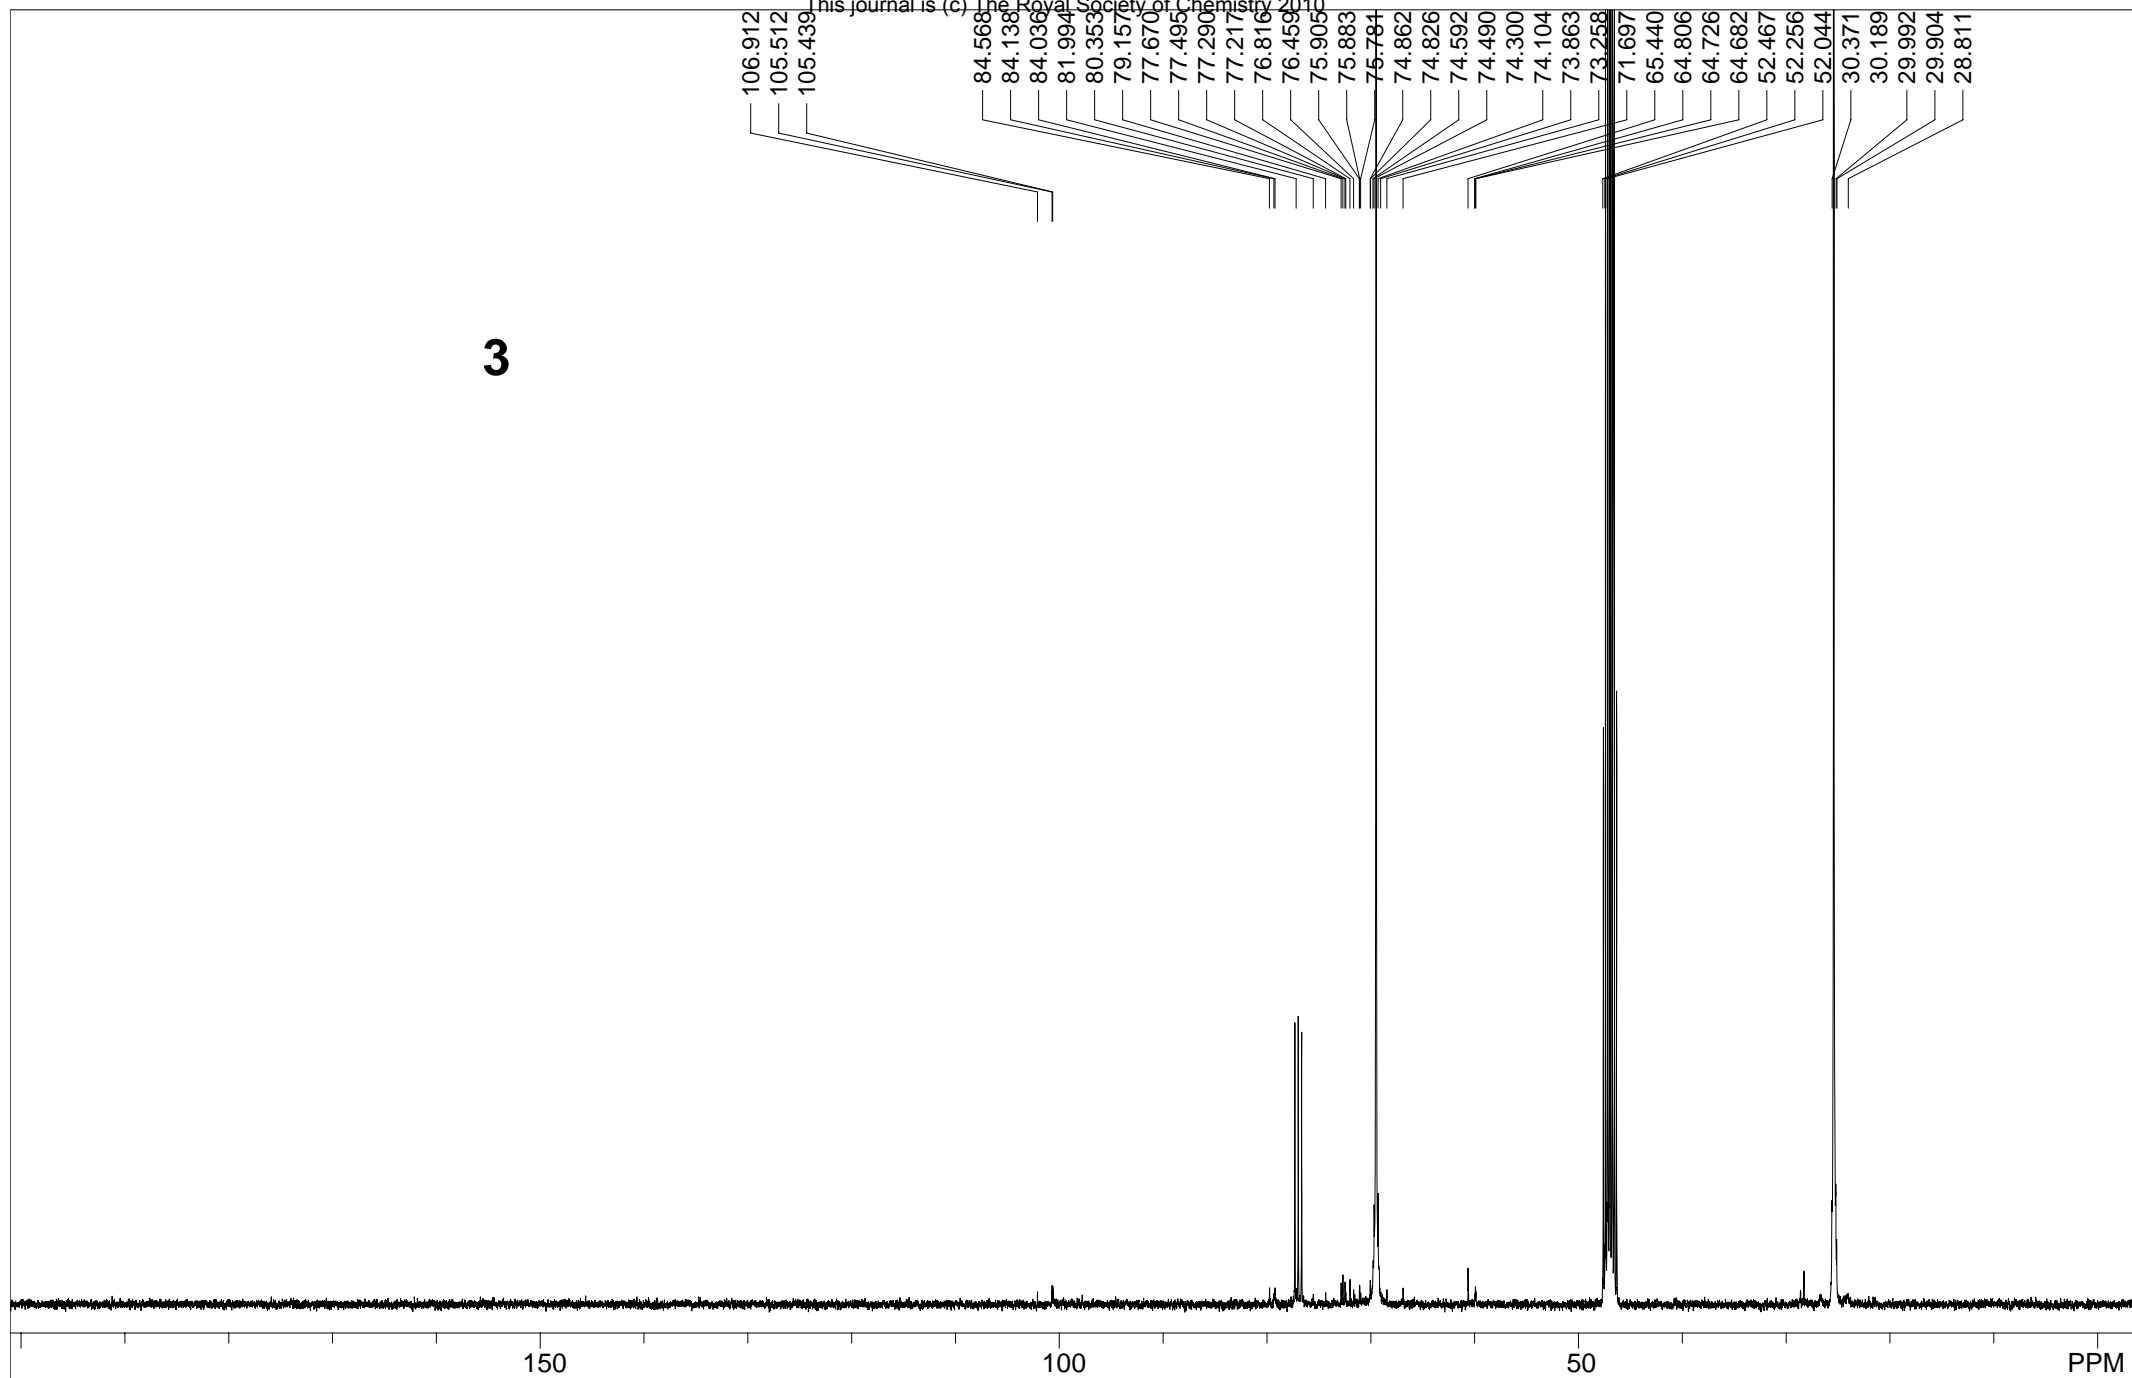

|                                                       |            |             |             |              |                         |
|-------------------------------------------------------|------------|-------------|-------------|--------------|-------------------------|
| USER: nmr -- DATE: 19:12:39.015 +0800 nmr@EP-ZH107708 |            |             |             |              |                         |
| F1: 100.610                                           | F2: 1.000  | SW1: 24038  | OF1: 9577.7 | PTS1d: 32768 |                         |
| EX: zgpg30                                            | PW: 8.6 us | PD: 2.0 sec | NA: 2024    | LB: 1.0      | Nuts - \$NMR -14100pC.1 |
